# Supplementary material for: Investigating palladium pincer complexes in catalytic asymmetric hydrophosphination and hydroarsination
Source: Royal Society of Chemistry journal article supplement (doi:10.1039/c9dt00221a), 2019-01-01
Supplement: c9dt00221a1.pdf [file c9dt00221a1.pdf]

**Investigating palladium pincer complexes in catalytic asymmetric hydrophosphination  
and hydroarsination**

Wee Shan Tay, Xiang-Yuan Yang, Yongxin Li, Sumod A. Pullarkat, Pak-Hing Leung\*

Division of Chemistry & Biological Chemistry, School of Physical and Mathematical Sciences,  
Nanyang Technological University, Singapore 637616, Singapore Fax: (+65) 6791 1961  
e-mail: pakhing@ntu.edu.sg

**Electronic Supporting Information**

|                                                                                |     |
|--------------------------------------------------------------------------------|-----|
| Table of contents                                                              | s1  |
| General information                                                            | s2  |
| Screening of conditions                                                        | s3  |
| Experimental section                                                           | s5  |
| NMR spectra                                                                    | s9  |
| HPLC spectra                                                                   | s15 |
| Investigating interactions between Pd catalysts and HAsPh <sub>2</sub>         | s40 |
| Investigating deprotonation of HAsPh <sub>2</sub> in MeOH by weak bases        | s44 |
| Investigating interactions between Pd catalyst <b>2a</b> and HPPH <sub>2</sub> | s46 |
| References                                                                     | s49 |
| X-ray structure and crystallographic data for compound <b>3</b>                | s50 |
| X-ray structure and crystallographic data for compound <b>7</b>                | s54 |



## Screening of conditions

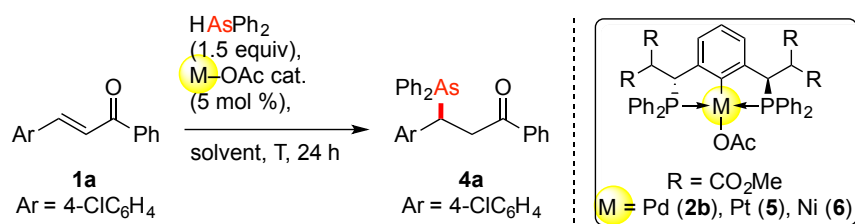

**Table S1.** Optimization of hydroarsination conditions with  $\text{M-OAc}$  complexes.<sup>a</sup>

| Entry          | Catalyst  | Solvent                     | T (°C) | Yield <sup>b</sup> (%) | <i>ee</i> <sup>c</sup> (%) |
|----------------|-----------|-----------------------------|--------|------------------------|----------------------------|
| 1              | <b>2b</b> | Acetone                     | 25     | 0                      | -                          |
| 2              | <b>2b</b> | MeOH                        | 25     | 16                     | 21                         |
| 3              | <b>2b</b> | MeOH/H <sub>2</sub> O (5%)  | 25     | 26                     | 32                         |
| 4              | <b>2b</b> | MeOH/H <sub>2</sub> O (10%) | 25     | 33                     | 42                         |
| 5              | <b>2b</b> | MeOH/H <sub>2</sub> O (15%) | 25     | 34                     | 29                         |
| 6              | <b>2b</b> | MeOH/H <sub>2</sub> O (10%) | 0      | 28                     | 49                         |
| 7              | <b>2b</b> | MeOH/H <sub>2</sub> O (10%) | -40    | 0                      | -                          |
| 8              | <b>2b</b> | MeOH/H <sub>2</sub> O (10%) | 35     | 16                     | 40                         |
| 9 <sup>d</sup> | <b>2b</b> | MeOH/H <sub>2</sub> O (10%) | 25     | 23                     | 41                         |
| 10             | <b>2b</b> | EtOH                        | 25     | 9                      | 46                         |
| 11             | <b>2b</b> | DEE                         | 25     | 11                     | 16                         |
| 12             | <b>2b</b> | MeCN                        | 25     | 0                      | -                          |
| 13             | <b>2b</b> | DMSO                        | 25     | 0                      | -                          |
| 14             | <b>2b</b> | MeNO <sub>2</sub>           | 25     | 0                      | -                          |
| 15             | <b>2b</b> | EtOH/H <sub>2</sub> O(10%)  | 25     | 29                     | 31                         |
| 16             | <b>5</b>  | MeOH                        | 25     | 0                      | -                          |
| 17             | <b>6</b>  | MeOH                        | 25     | 0                      | -                          |

<sup>a</sup>Reaction conditions: Enone **1a** (12.1 mg, 0.05 mmol, 1.0 eq.),  $\text{HAsPh}_2$  (17.26 mg, 0.08 mmol, 1.5 eq.), cat. (5 mol %), solvent (2 mL). <sup>b</sup><sup>1</sup>H NMR yield with respect to enone **1**. <sup>c</sup>Determined by chiral HPLC of the crude reaction mixture. <sup>d</sup>Cat. (*R,R*)-**2b** (6.74 mg, 7.50 μmol, 15 mol %) was used instead.

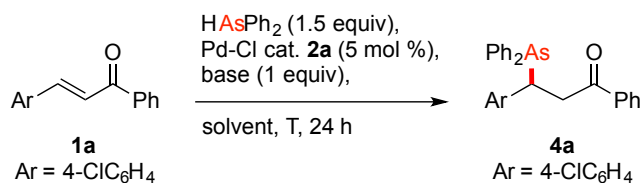

**Table s2.** Optimization of conditions for PCP Pd-Cl catalyst **2a**.<sup>a</sup>

| Entry | Solvent                                 | Base                            | T (°C) | Yield <sup>b</sup> (%) | ee <sup>c</sup> (%) |
|-------|-----------------------------------------|---------------------------------|--------|------------------------|---------------------|
| 1     | MeOH                                    | -                               | 25     | 24                     | 13                  |
| 2     | EtOH/H <sub>2</sub> O(10%) <sup>d</sup> | -                               | 25     | 33                     | 7                   |
| 3     | MeOH                                    | K <sub>2</sub> CO <sub>3</sub>  | 25     | 6                      | 4                   |
| 4     | EtOH                                    | K <sub>3</sub> PO <sub>4</sub>  | 25     | 60                     | 19                  |
| 5     | EtOH                                    | Na <sub>2</sub> CO <sub>3</sub> | 25     | 5                      | 44                  |
| 6     | EtOH                                    | NaHCO <sub>3</sub>              | 25     | 28                     | 1                   |
| 7     | EtOH                                    | NaI                             | 25     | 0                      | -                   |
| 8     | EtOH                                    | KF <sup>e</sup>                 | 25     | 24                     | 66                  |
| 9     | EtOH                                    | CsCl <sup>e</sup>               | 25     | 36                     | 61                  |
| 10    | EtOH                                    | KCl <sup>e</sup>                | 25     | 0                      | -                   |
| 11    | MeOH                                    | CsF                             | 25     | 61                     | 44                  |

<sup>a</sup>Reaction conditions: Enone **1a** (12.1 mg, 0.05 mmol, 1.0 eq.), HAsPh<sub>2</sub> (17.26 mg, 0.08 mmol, 1.5 eq.), cat. (*R,R*)-**2a** (2.12 mg, 2.50 μmol, 5 mol %), base (0.05 mmol, 1.0 eq.), solvent (2 mL). <sup>b</sup><sup>1</sup>H NMR yield with respect to enone **1**. <sup>c</sup>Determined by chiral HPLC of the crude reaction mixture. <sup>d</sup>H<sub>2</sub>O (10 % v/v). <sup>e</sup>Base (0.50 mmol, 10 equiv.) was used instead.

## Experimental section

### General procedure for the preparation of complex **2a**, **5**, **6**

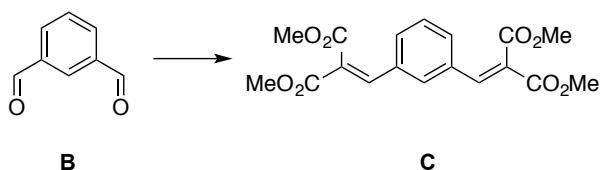

*Scheme s1. Synthesis of ligand precursor C.*

Dimethyl malonate (5.40 g, 14.91 mmol, 2.0 equiv) and piperidine (6.34g, 1.49 mmol, 0.2 equiv) were dissolved in *n*-heptane (5 mL) to which isophthalaldehyde **B** (1.00 g, 7.45 mmol, 1.0 equiv) and glacial AcOH (89.47 mg, 1.49 mmol, 0.2 equiv.) were added sequentially. The mixture was refluxed at 140°C under Dean-Stark conditions for 24 h and cooled to RT before volatiles were removed under reduced pressure. The mixture was extracted with DCM (3 X 30 mL) and the organic layer was washed with saturated NaHCO<sub>3</sub> (1 X 30 mL) and water (3 X 30 mL), dried over MgSO<sub>4</sub>, filtered and concentrated. The crude product was purified by silica gel chromatography (2 *n*-hexanes : 1 EA) to afford compound **C** as a pale yellow solid in 80% yield. The spectroscopic data obtained is consistent with literature.<sup>7</sup>

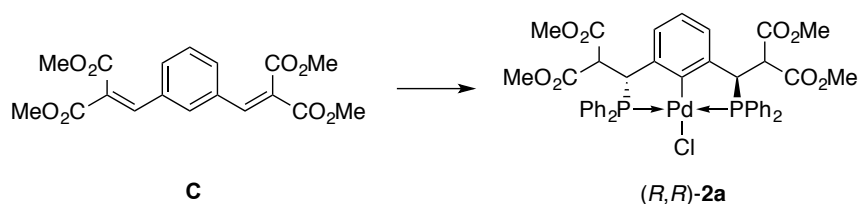

*Scheme s2. Synthesis of complex (R,R)-2a.*

Catalyst **(S)-A** (38.29 mg, 0.061 mmol, 5 mol %) was added to a solution of HPPH<sub>2</sub> (0.25 g, 1.33 mmol, 2.3 equiv.) in DCM (10 mL) and cooled to -80°C. Compound **C** (0.21 g, 0.578 mmol, 1.0 equiv.) was added followed by the dropwise addition of NEt<sub>3</sub> (0.12 g, 1.16 mmol, 2.0 equiv.) in DCM (1 mL). After stirring at -80°C for 3 days, the solution was slowly warmed to RT over 3 h. PdCl<sub>2</sub>(CH<sub>3</sub>CN)<sub>2</sub> (0.15 g, 0.578 mmol, 1.0 equiv.) was added and the solution was stirred overnight at RT and volatiles were removed. The crude product was purified *via* silica gel chromatography (DCM) to afford complex **(R,R)-2a** as a white solid in 86% yield. The spectroscopic data obtained is consistent with literature.<sup>7</sup>

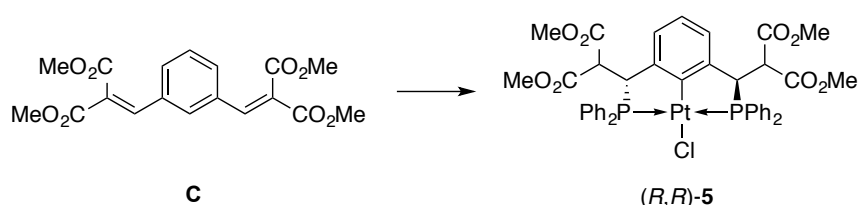

*Scheme s3. Synthesis of complex (R,R)-5.*

Catalyst **(S)-A** (38.29 mg, 0.061 mmol, 5 mol %) was added to a solution of HPPH<sub>2</sub> (0.25 g, 1.33 mmol, 2.3 equiv.) in DCM (10 mL) and cooled to -80°C. Compound **C** (0.21 g, 0.578 mmol, 1.0 equiv.) was added followed by the dropwise addition of NEt<sub>3</sub> (0.12 g, 1.16 mmol, 2.0 equiv.) in DCM (1 mL). After stirring at -80°C for 3 days, the solution was slowly warmed to RT over 3 h. Volatiles were removed and the residue was redissolved in toluene. PtCl<sub>2</sub>(CH<sub>3</sub>CN)<sub>2</sub> (0.20 g, 0.578 mmol, 1.0 equiv.) was added and the solution was heated at

100°C for 4h. Upon cooling to RT, volatiles were removed and the crude product was purified *via* silica gel chromatography (19 DCM : 1 EA) to afford complex (*R,R*)-**5** as a white solid. The spectroscopic data obtained is consistent with literature.<sup>7</sup>

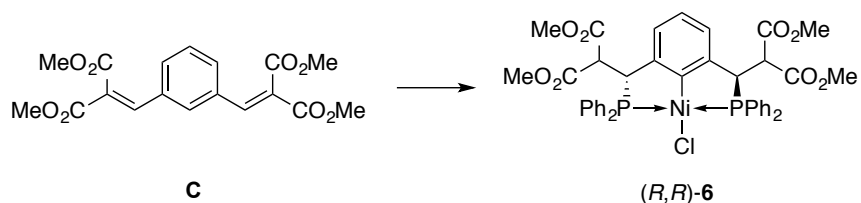

**Scheme s4.** Synthesis of complex (*R,R*)-**6**.

Catalyst (*S*)-**A** (38.29 mg, 0.061 mmol, 5 mol %) was added to a solution of HPPPh<sub>2</sub> (0.25 g, 1.33 mmol, 2.3 equiv.) in DCM (10 mL) and cooled to -80°C. Compound **C** (0.21 g, 0.578 mmol, 1.0 equiv.) was added followed by the dropwise addition of NEt<sub>3</sub> (0.12 g, 1.16 mmol, 2.0 equiv.) in DCM (1 mL). After stirring at -80°C for 3 days, the solution was slowly warmed to RT over 3 h. Volatiles were removed and the residue was redissolved in EtOH. A solution of NiCl<sub>2</sub>(CH<sub>3</sub>CN)<sub>2</sub> (0.12 g, 0.578 mmol, 1.0 equiv.) in H<sub>2</sub>O (1 mL) was added and the mixture heated at 60°C for 4 h. NEt<sub>2</sub><sup>*i*</sup>Pr (74.70 mg, 0.578 mmol, 1.0 equiv.) was then added and the mixture was refluxed at 80°C for 1 h. After cooling to RT, volatiles were removed and the crude product was purified *via* silica gel chromatography (19 DCM : 1 EA) to afford complex (*R,R*)-**6** as a yellow solid in 68% yield. The spectroscopic data obtained is consistent with literature.<sup>7</sup>

### General procedure for the catalytic asymmetric hydrophosphination reaction

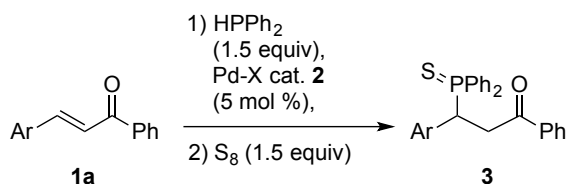

**Scheme s5.** Pd-catalyzed asymmetric hydrophosphination reaction.

HPPPh<sub>2</sub> (13.96 mg, 0.08 mmol, 1.5 equiv) was charged to a pre-weighed Schlenk vessel under N<sub>2</sub>. Catalyst **2** (2.50 μmol, 5 mol %) was added, washed down with the stated solvent (2 mL) and brought to the desired temperature. Enone **1a** (12.1 mg, 0.05 mmol, 1.0 equiv) was subsequently added and the reaction was stirred at the stated temperature. Reaction progress was monitored with <sup>31</sup>P{<sup>1</sup>H} NMR spectroscopy and upon complete conversion, S<sub>8</sub> (3.21 mg, 0.10 mmol, 2.0 equiv) was added and the solution was allowed to RT. After stirring for 30 mins at RT, volatiles were removed and the crude product was purified *via* silica gel chromatography (5 Hexane: 1 EA) to afford the pure phosphine sulfide **3** as a white solid. The *ee* was determined on a Daicel Chiralpak IC column with *n*-hexane/2-propanol = 97/3, flow = 0.8 mL/min, wavelength = 220 nm. Retention times: 9.5 min (major, *S* isomer), 12.1 min (minor, *R* isomer). [α]<sub>D</sub> = -226.0 (*c* 1.00, DCM). Mp: 117.1-118.2°C. <sup>1</sup>H NMR (CDCl<sub>3</sub>, 400 MHz): δ 8.18-8.12 (m, 2H, Ar), 7.86-7.84 (m, 2H, Ar), 7.55-7.50 (m, 6H, Ar), 7.42-7.40 (m, 3H, Ar), 7.28-7.25 (m, 4H, Ar), 7.08-7.06 (m, 2H, Ar), 4.83 (ddd, 1H, <sup>3</sup>J<sub>PH</sub> = 10.2 Hz, <sup>3</sup>J<sub>HH</sub> = 10.2 Hz, <sup>3</sup>J<sub>HH</sub> = 2.4 Hz, PCCH), 4.06 (ddd, 1H, <sup>2</sup>J<sub>PH</sub> = 18.3 Hz, <sup>3</sup>J<sub>HH</sub> = 10.5 Hz, <sup>2</sup>J<sub>HH</sub> = 5.24 Hz, PCH), 3.30 (ddd, 1H, <sup>2</sup>J<sub>PH</sub> = 18.0 Hz, <sup>3</sup>J<sub>HH</sub> = 11.6 Hz, <sup>2</sup>J<sub>HH</sub> = 2.4 Hz, PCH); <sup>13</sup>C NMR (CDCl<sub>3</sub>, 100 MHz): δ 196.8 (s, 1C, C=O), 133.8-128.3 (12C, Ar), 40.8 (s, 1C, C(O)CH), 39.8

(d, 1C,  $^1J_{PC} = 3.9$  Hz, PC);  $^{31}\text{P}\{^1\text{H}\}$  NMR ( $\text{CDCl}_3$ , 162 MHz):  $\delta$  51.0. HRMS (+ESI)  $m/z$ : ( $\text{M} + \text{H}$ ) $^+$  calcd for  $\text{C}_{27}\text{H}_{23}\text{ClOPS}$ , 461.0896; found, 461.0892.

### General procedure for the catalytic asymmetric hydroarsination reaction

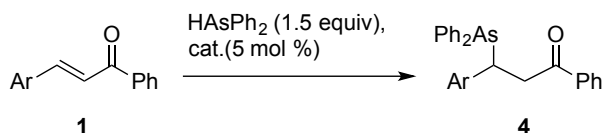

*Scheme s6.* Catalytic asymmetric hydroarsination reaction.

$\text{HAsPh}_2$  (17.26 mg, 0.08 mmol, 1.5 equiv) was charged to a pre-weighed Schlenk vessel under  $\text{N}_2$ . Catalyst (2.50  $\mu\text{mol}$ , 5 mol %) and base (0.50 mmol, 10.0 equiv) was added, washed down with the stated solvent (2 mL) and brought to the desired temperature. Enone **1** (0.05 mmol, 1.0 equiv) was subsequently added and the reaction was stirred at the stated temperature. After 24 h, volatiles were removed and two drops of the crude reaction mixture was withdrawn from the flask and diluted with IPA (1 mL) to prepare the HPLC sample. Arsenine adduct **4a** could be crystallized from DEE to afford the pure product **4a** as white crystalline needles.

**4a** White solid. 72% yield. The *ee* was determined on a Daicel Chiralpak IF column with *n*-hexane/2-propanol = 98/2, flow = 1.0 mL/min, wavelength = 230 nm. Retention times: 10.2 min (major), 11.2 min (minor).  $[\alpha]_{\text{D}} = -171.8$  (*c* 4.70, DEE) (measured for Table 4 Entry 1). Mp: 137.2-138.2°C.  $^1\text{H}$  NMR ( $\text{CDCl}_3$ , 400 MHz):  $\delta$  7.76-7.73 (m, 2H, Ar), 7.63-7.61 (m, 2H, Ar), 7.52-7.48 (m, 1H, Ar), 7.42-7.35 (m, 5H, Ar), 7.23-7.15 (m, 3H, Ar), 7.11-7.08 (m, 4H, Ar), 7.06-7.02 (m, 2H, Ar), 4.19 (dd, 1H,  $^3J_{\text{HH}} = 11.2$  Hz,  $^2J_{\text{HH}} = 3.2$  Hz, AsCCH), 3.67 (dd, 1H,  $^3J_{\text{HH}} = 17.2$  Hz,  $^3J_{\text{HH}} = 11.2$  Hz, AsCH), 3.22 (dd, 1H,  $^3J_{\text{HH}} = 17.2$  Hz,  $^2J_{\text{HH}} = 3.2$  Hz, AsCCH);  $^{13}\text{C}$  NMR ( $\text{CDCl}_3$ , 100 MHz):  $\delta$  198.2 (s, 1C, C=O), 134.1-128.2 (12C, Ar), 42.2 (s, 1C, AsC), 40.2 (s, 1C, C(O)CH). HRMS (+ESI)  $m/z$ : ( $\text{M} + \text{H}$ ) $^+$  calcd for  $\text{C}_{27}\text{H}_{23}\text{AsClO}$ , 473.0653; found, 473.0648.

**4b** White solid. The *ee* was determined on a Daicel Chiralpak IF column with *n*-hexane/2-propanol = 99/1, flow = 0.8 mL/min, wavelength = 230 nm. Retention times: 18.5 min (major), 20.1 min (minor).  $[\alpha]_{\text{D}} = -38.6$  (*c* 4.90, DEE) (measured for Table 4 Entry 2). Mp: 126.3-127.2°C.  $^1\text{H}$  NMR ( $\text{CDCl}_3$ , 400 MHz):  $\delta$  7.75-7.73 (m, 2H, Ar), 7.65-7.63 (m, 2H, Ar), 7.50-7.46 (m, 1H, Ar), 7.41-7.34 (m, 5H, Ar), 7.22-7.18 (m, 1H, Ar), 7.15-7.12 (m, 6H, Ar), 7.08-7.05 (m, 3H, Ar), 4.23 (dd, 1H,  $^3J_{\text{HH}} = 11.2$  Hz,  $^2J_{\text{HH}} = 3.2$  Hz, AsCCH), 3.73 (dd, 1H,  $^3J_{\text{HH}} = 17.2$  Hz,  $^3J_{\text{HH}} = 11.2$  Hz, AsCH), 3.21 (dd, 1H,  $^3J_{\text{HH}} = 16.8$  Hz,  $^2J_{\text{HH}} = 3.2$  Hz, AsCCH);  $^{13}\text{C}$  NMR ( $\text{CDCl}_3$ , 100 MHz):  $\delta$  198.5 (s, 1C, C=O), 135.3-126.3 (12C, Ar), 42.4 (s, 1C, AsC), 40.9 (s, 1C, C(O)CH). HRMS (+ESI)  $m/z$ : ( $\text{M} + \text{H}$ ) $^+$  calcd for  $\text{C}_{27}\text{H}_{24}\text{AsO}$ , 439.1043; found, 439.1043.

**4c** White solid. The *ee* was determined on a Daicel Chiralpak IF column with *n*-hexane/2-propanol = 97/3, flow = 1.0 mL/min, wavelength = 254 nm. Retention times: 15.5 min (major), 17.8 min (minor).  $[\alpha]_{\text{D}} = -23.7$  (*c* 3.80, DEE) (measured for Table 4 Entry 3).  $^1\text{H}$  NMR ( $\text{CDCl}_3$ , 400 MHz):  $\delta$  7.74-7.72 (m, 2H, Ar), 7.64-7.62 (m, 2H, Ar), 7.50-7.46 (m, 1H, Ar), 7.42-7.33 (m, 5H, Ar), 7.20-7.13 (m, 3H, Ar), 7.09-7.04 (m, 4H, Ar), 6.70-6.68 (m, 2H, Ar), 4.18 (dd, 1H,  $^3J_{\text{HH}} = 11.1$  Hz,  $^2J_{\text{HH}} = 3.0$  Hz, AsCCH), 3.67 (dd, 1H,  $^3J_{\text{HH}} = 16.9$  Hz,  $^3J_{\text{HH}} = 11.3$  Hz,

AsCH), 3.17 (dd, 1H,  $^3J_{\text{HH}} = 17.0$  Hz,  $^2J_{\text{HH}} = 3.1$  Hz, AsCCH). HRMS (+ESI) m/z: (M + H)<sup>+</sup> calcd for C<sub>28</sub>H<sub>26</sub>AsO<sub>2</sub>, 469.1149; found, 469.1148.

**4d** White solid. The *ee* was determined on a Daicel Chiralpak IF column with *n*-hexane/2-propanol = 98/2, flow = 1.0 mL/min, wavelength = 254 nm. Retention times: 11.9 min (major), 13.4 min (minor).  $[\alpha]_{\text{D}} = -48.8$  (*c* 3.70, DEE) (measured for Table 4 Entry 4). <sup>1</sup>H NMR (CDCl<sub>3</sub>, 400 MHz):  $\delta$  7.80-7.78 (m, 2H, Ar), 7.66-7.63 (m, 3H, Ar), 7.49-7.38 (m, 6H, Ar), 7.16-7.12 (m, 6H, Ar), 7.07-7.05 (m, 2H, Ar), 4.22 (dd, 1H,  $^3J_{\text{HH}} = 11.1$  Hz,  $^2J_{\text{HH}} = 3.2$  Hz, AsCCH), 3.70 (dd, 1H,  $^3J_{\text{HH}} = 17.0$  Hz,  $^3J_{\text{HH}} = 11.1$  Hz, AsCH), 3.18 (dd, 1H,  $^3J_{\text{HH}} = 16.9$  Hz,  $^2J_{\text{HH}} = 3.2$  Hz, AsCCH), 2.35 (s, 3H, CH<sub>3</sub>). HRMS (+ESI) m/z: (M + H)<sup>+</sup> calcd for C<sub>28</sub>H<sub>26</sub>AsO, 453.1200; found, 453.1198.

**4e** White solid. The *ee* was determined on a Daicel Chiralpak IF column with *n*-hexane/2-propanol = 99/1, flow = 0.8 mL/min, wavelength = 260 nm. Retention times: 14.8 min (major), 16.2 min (minor).  $[\alpha]_{\text{D}} = -56.6$  (*c* 6.80, DEE) (measured for Table 4 Entry 5). <sup>1</sup>H NMR (CDCl<sub>3</sub>, 400 MHz):  $\delta$  7.80-7.76 (m, 3H, Ar), 7.64-7.62 (m, 2H, Ar), 7.58-7.47 (m, 4H, Ar), 7.42-7.36 (m, 6H, Ar), 7.21-7.14 (m, 3H, Ar), 7.01-7.05 (m, 1H, Ar), 4.28 (dd, 1H,  $^3J_{\text{HH}} = 11.2$  Hz,  $^2J_{\text{HH}} = 3.2$  Hz, AsCCH), 3.75 (dd, 1H,  $^3J_{\text{HH}} = 17.4$  Hz,  $^3J_{\text{HH}} = 11.2$  Hz, AsCH), 3.29 (dd, 1H,  $^3J_{\text{HH}} = 17.5$  Hz,  $^2J_{\text{HH}} = 3.3$  Hz, AsCCH); <sup>19</sup>F NMR (CDCl<sub>3</sub>, 377 MHz):  $\delta$  -62.4 (s). HRMS (+ESI) m/z: (M + H)<sup>+</sup> calcd for C<sub>28</sub>H<sub>23</sub>AsF<sub>3</sub>O, 507.0917; found, 507.0911.



## NMR spectra

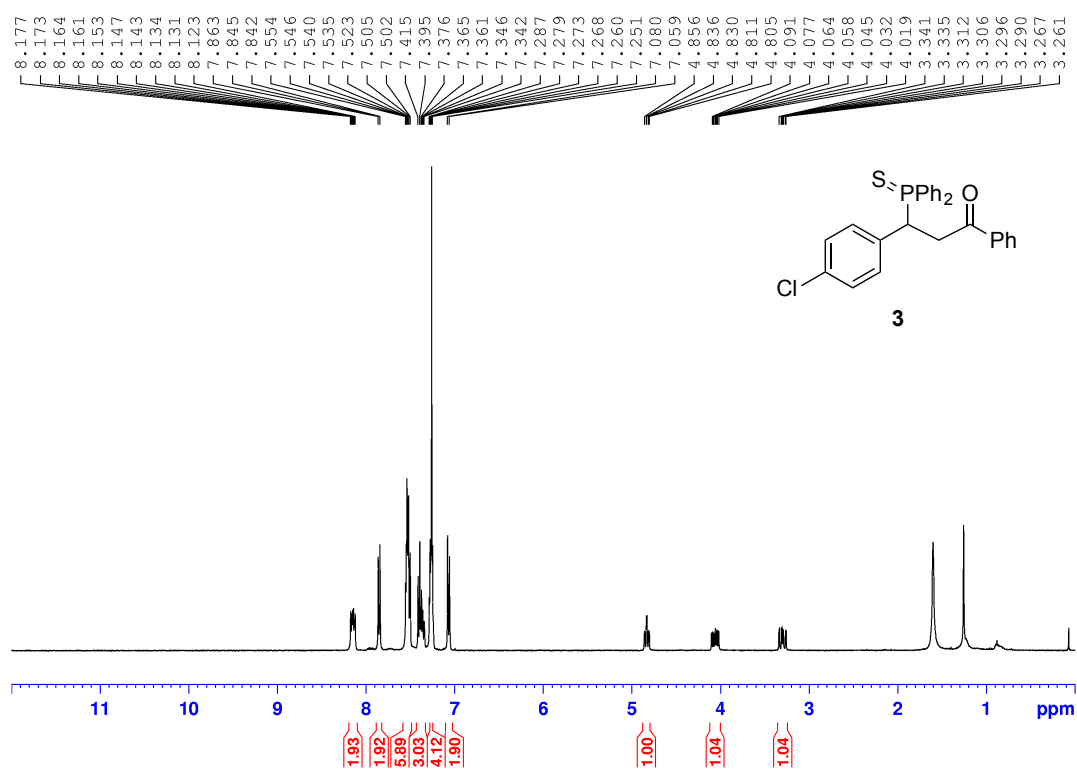

Figure s2. <sup>1</sup>H NMR spectrum of phosphine sulfide **3** in CDCl<sub>3</sub>.

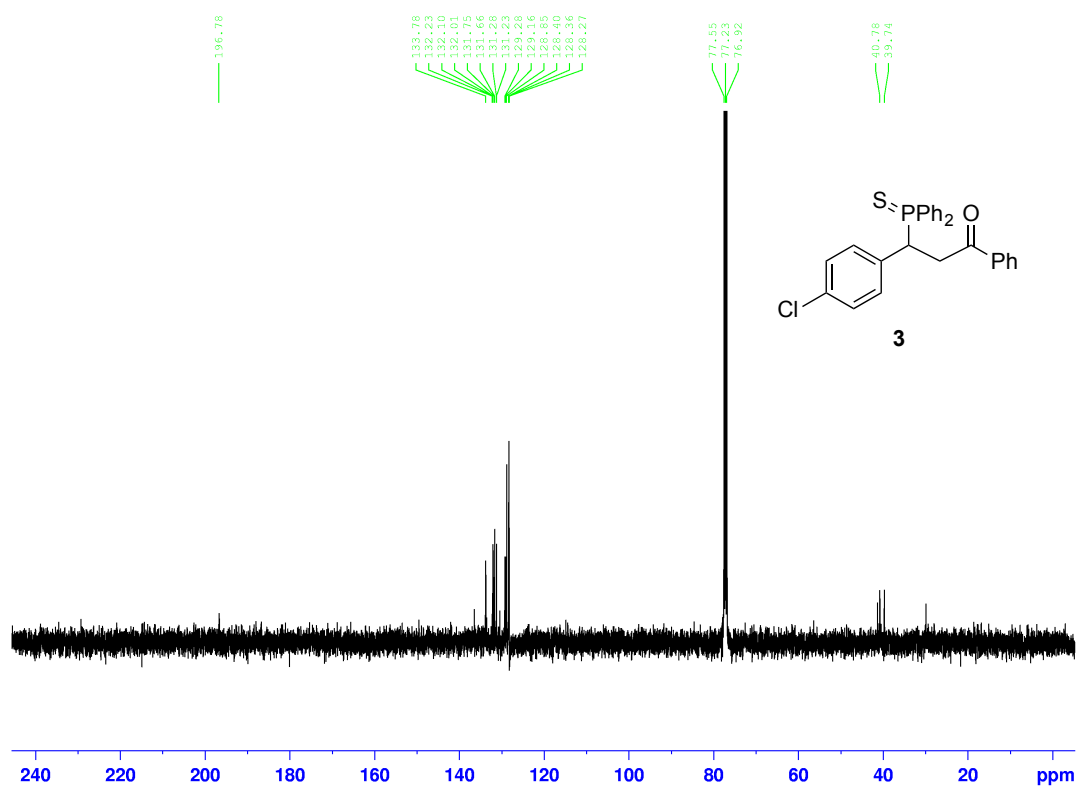

Figure s3. <sup>13</sup>C NMR spectrum of phosphine sulfide **3** in CDCl<sub>3</sub>.

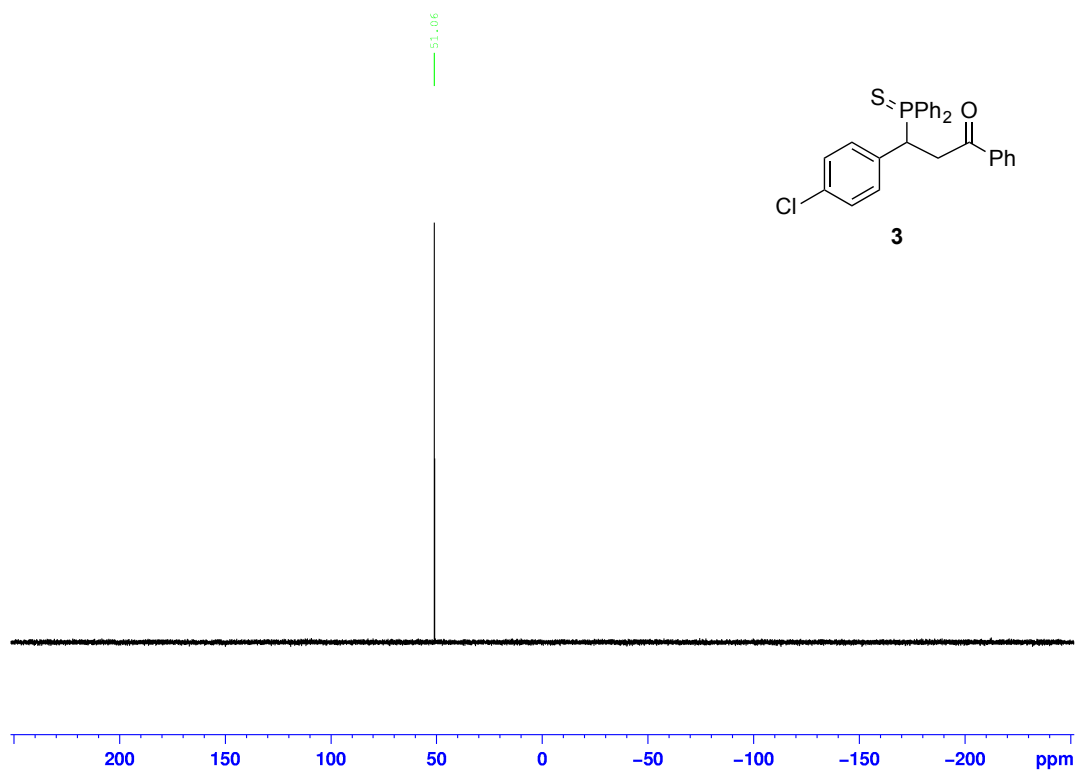

Figure s4.  $^{31}\text{P}\{^1\text{H}\}$  NMR spectrum of phosphine sulfide **3** in  $\text{CDCl}_3$ .

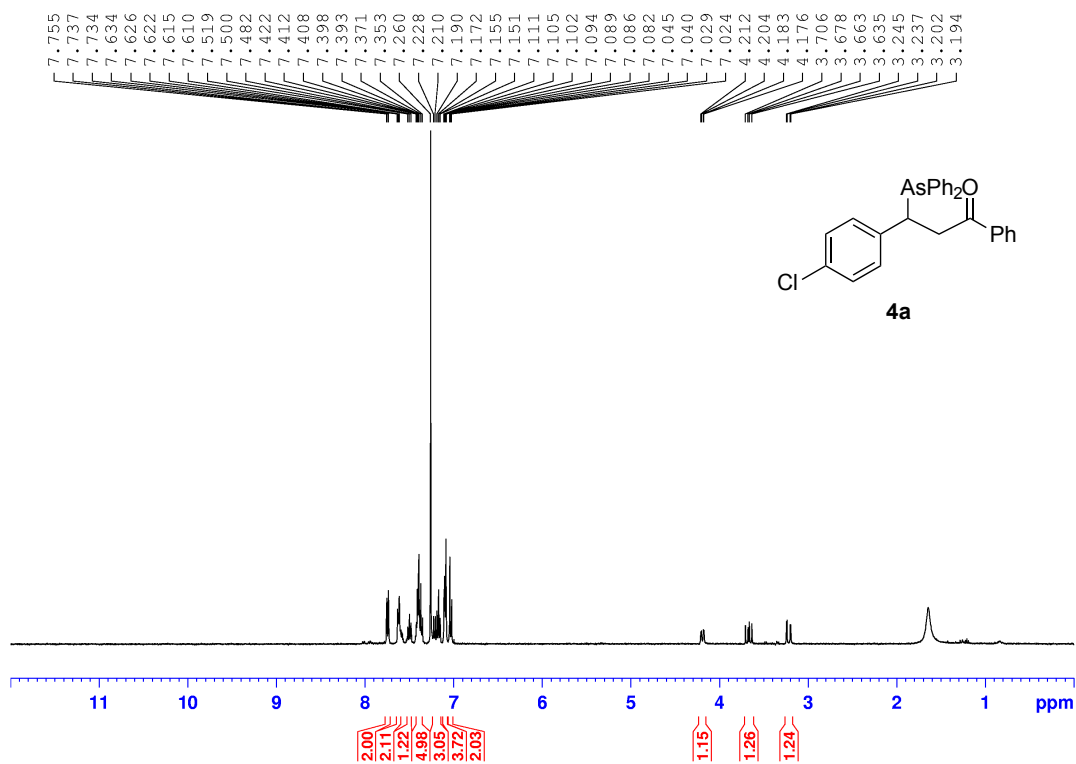

Figure s5.  $^1\text{H}$  NMR spectrum of arsine **4a** in  $\text{CDCl}_3$ .

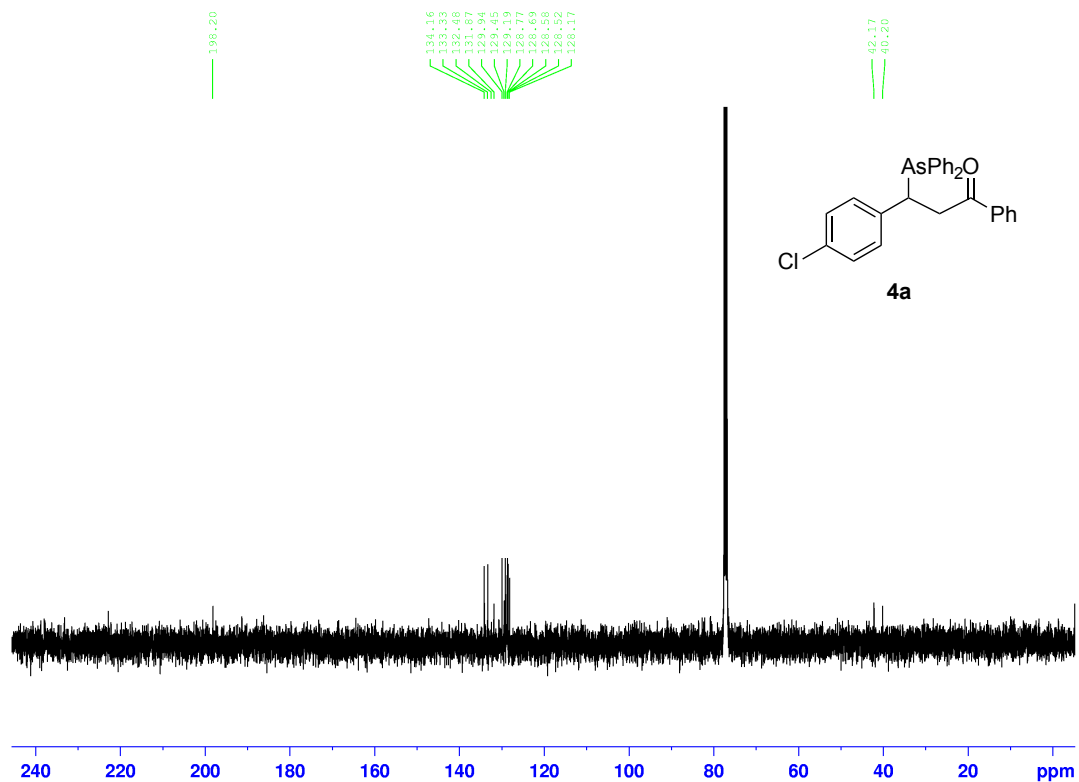

Figure s6. <sup>13</sup>C NMR spectrum of arsine **4a** in CDCl<sub>3</sub>.

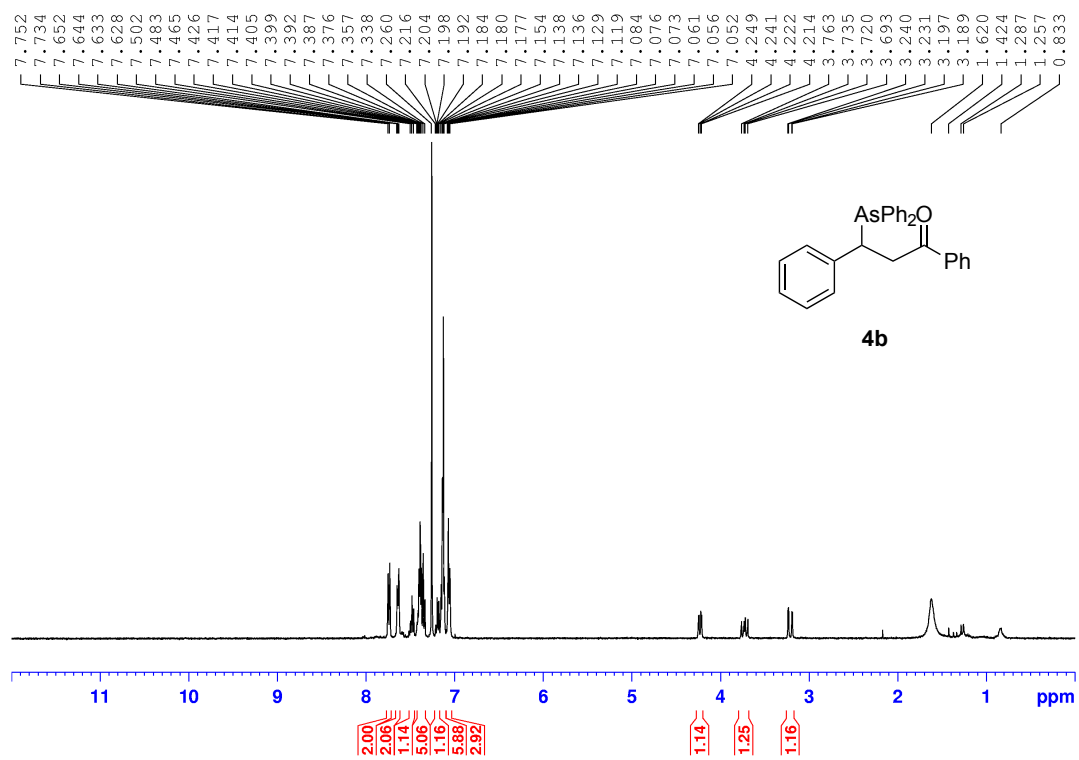

Figure s7. <sup>1</sup>H NMR spectrum of arsine **4b** in CDCl<sub>3</sub>.

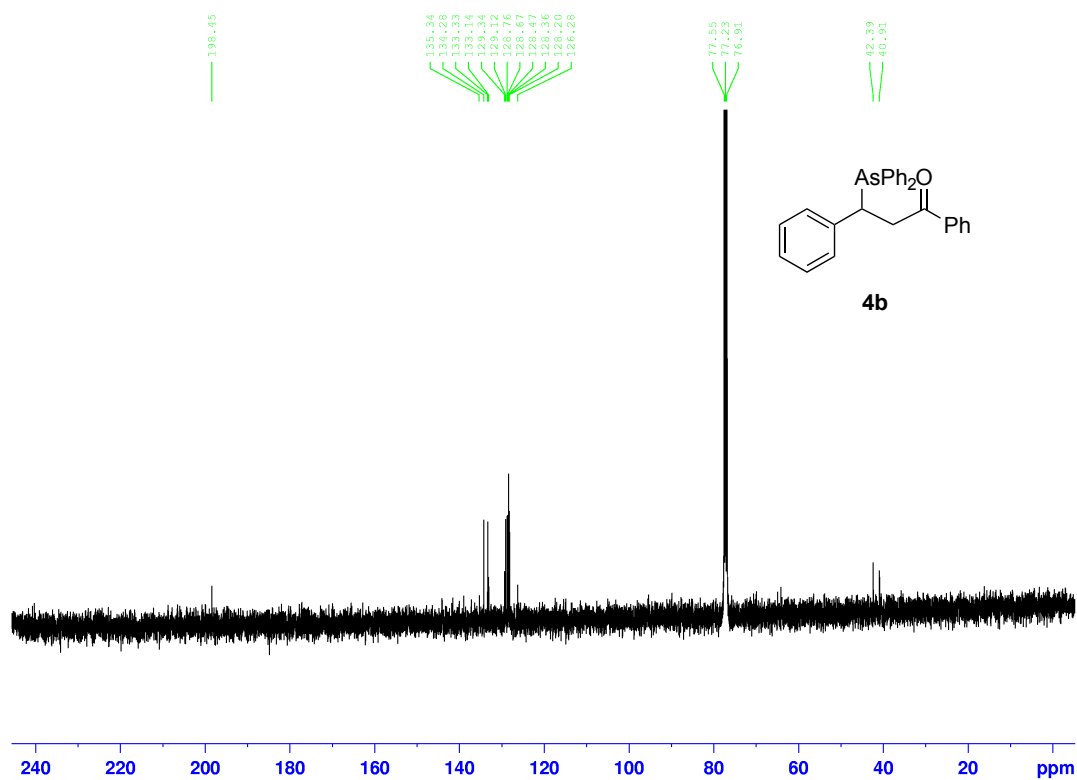

Figure s8.  $^{13}\text{C}$  NMR spectrum of arsine **4b** in  $\text{CDCl}_3$ .

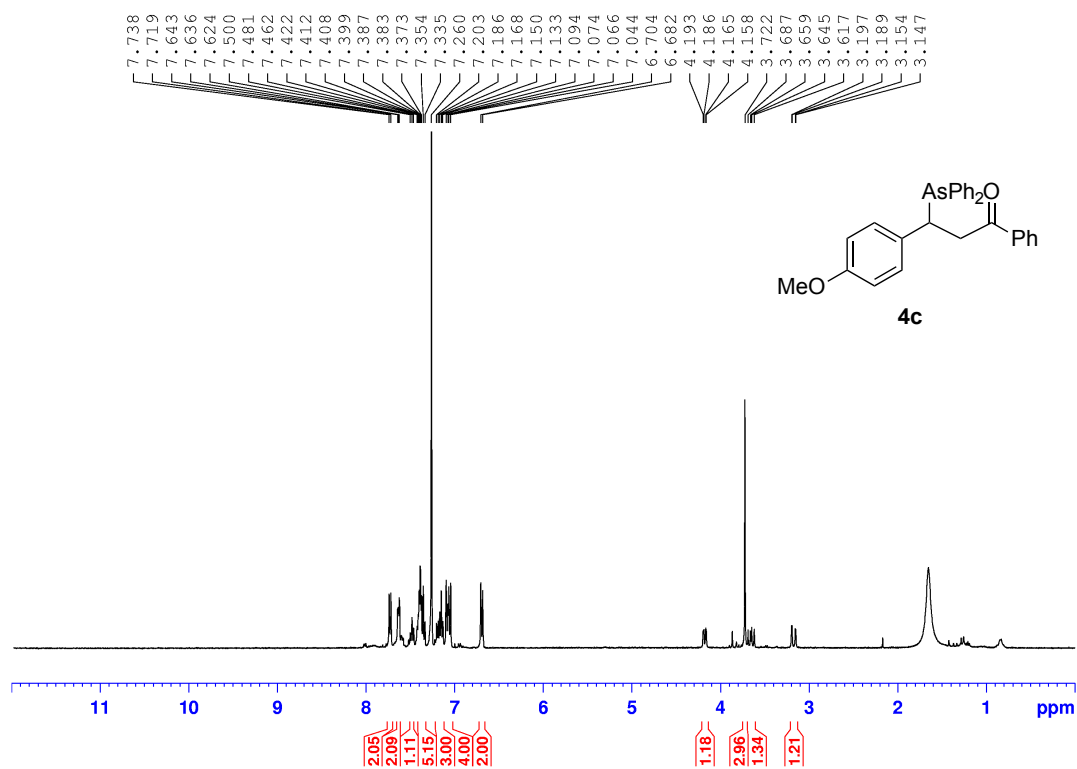

Figure s9.  $^1\text{H}$  NMR spectrum of arsine **4c** in  $\text{CDCl}_3$ .

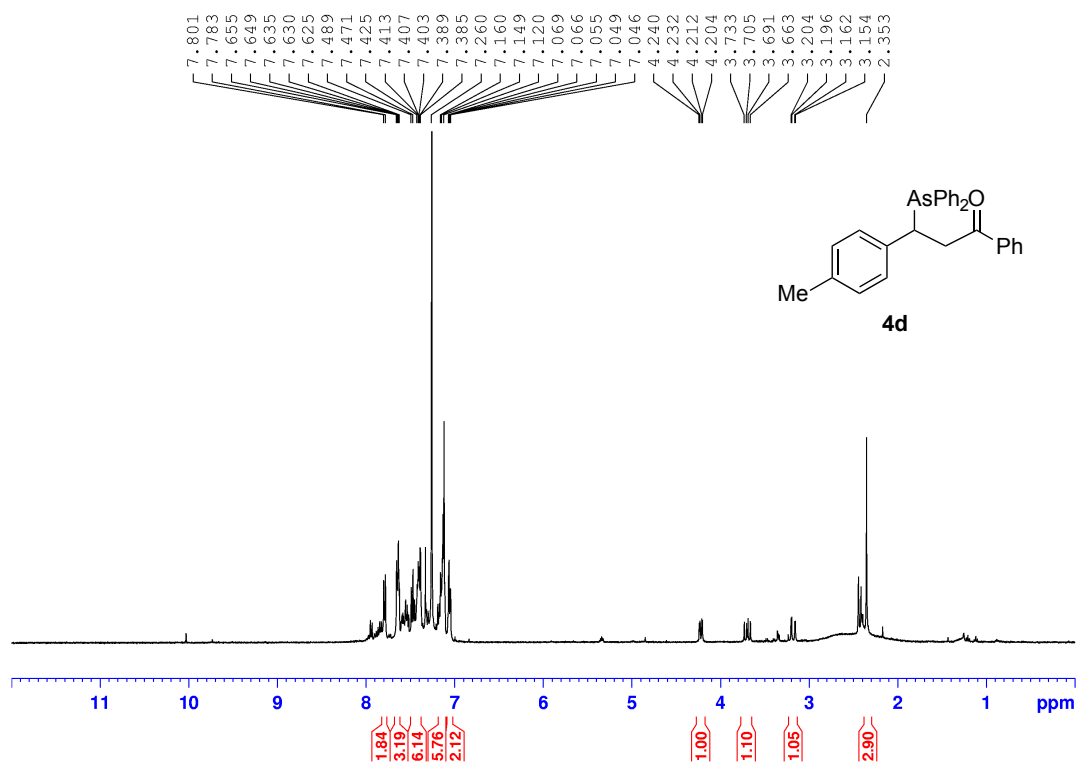

Figure s10.  $^1\text{H}$  NMR spectrum of arsine **4d** in  $\text{CDCl}_3$ .

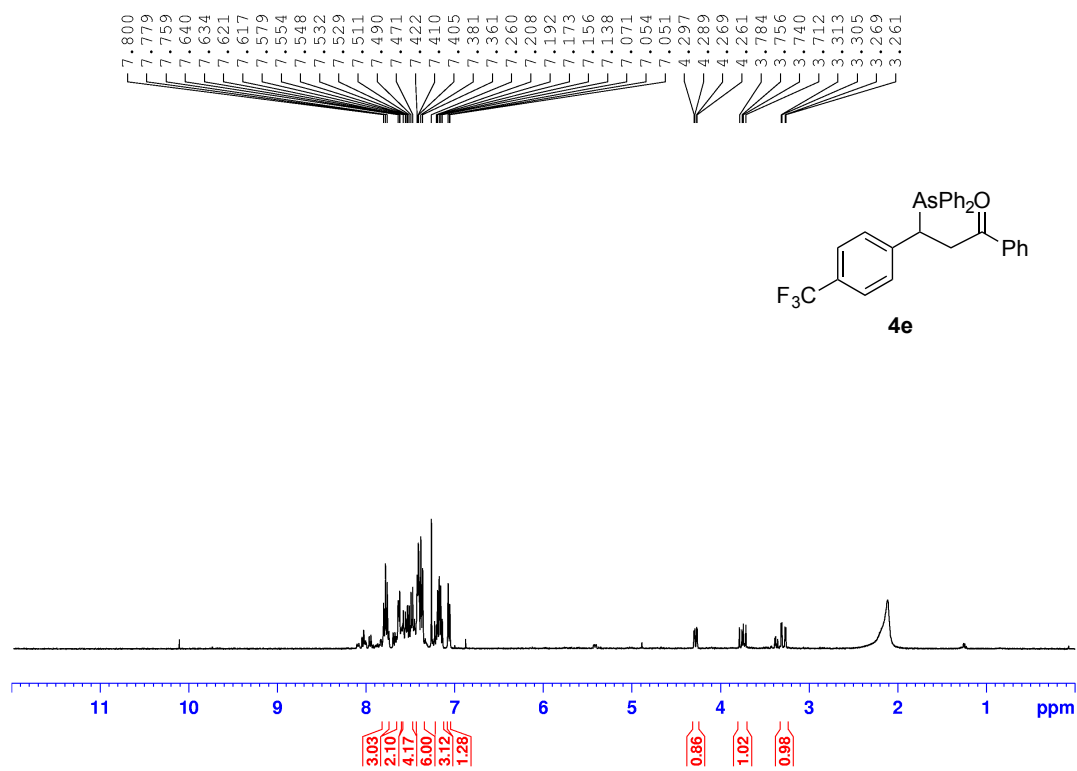

Figure s11.  $^1\text{H}$  NMR spectrum of arsine **4e** in  $\text{CDCl}_3$ .

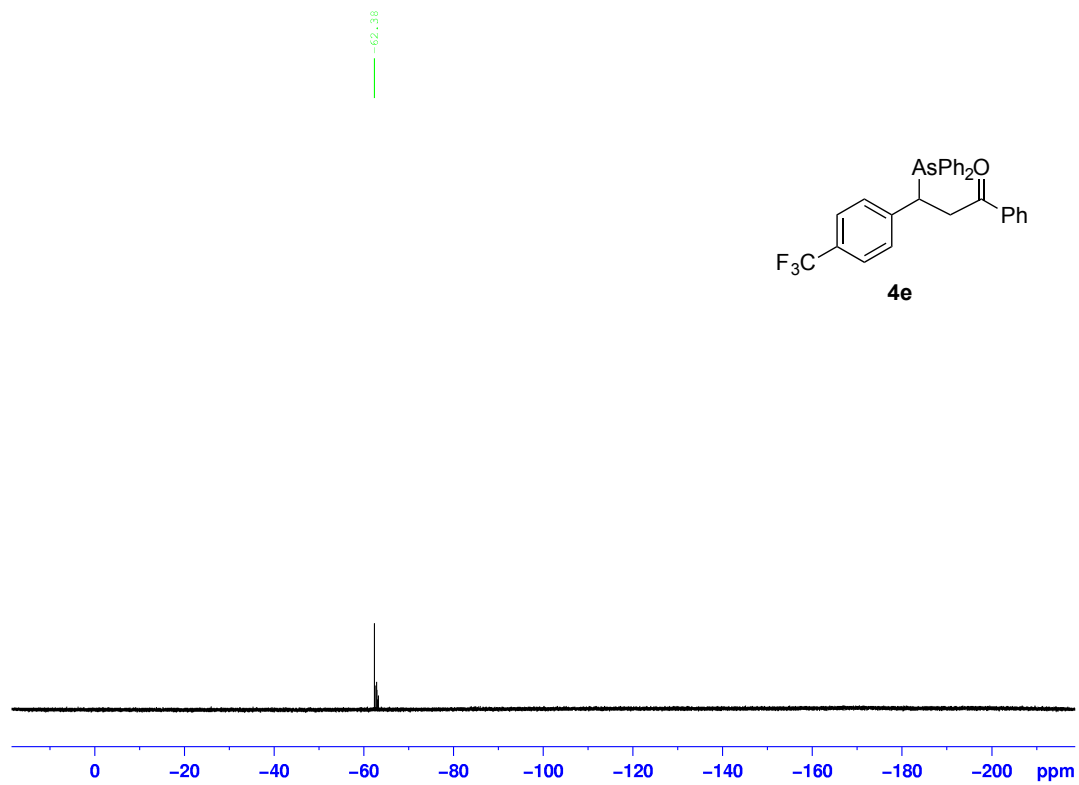

**Figure s12.**  $^{19}\text{F}$  NMR spectrum of arsine **4e** in  $\text{CDCl}_3$ .

## HPLC spectra

### Racemic phosphine sulfide 3

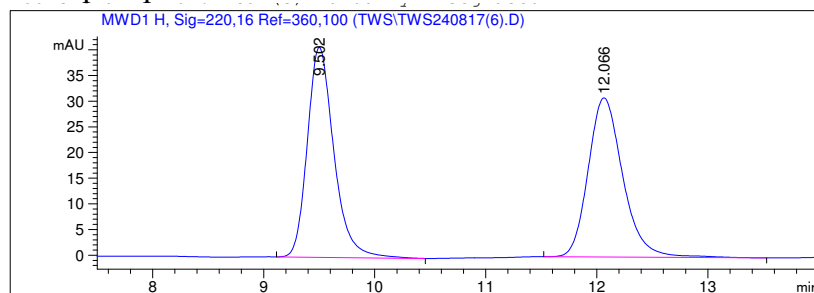

#### Area Percent Report

```
Sorted By      :      Signal
Multiplier:    :      1.0000
Dilution:      :      1.0000
Sample Amount: :      1.00000 [ng/ul] (not used in calc.)
Do not use Multiplier & Dilution Factor with ISTDs
```

Signal 1: MWD1 H, Sig=220,16 Ref=360,100

| Peak # | RetTime [min] | Type | Width [min] | Area [mAU*s] | Height [mAU] | Area %  |
|--------|---------------|------|-------------|--------------|--------------|---------|
| 1      | 9.502         | BB   | 0.2539      | 680.07605    | 40.90984     | 50.2851 |
| 2      | 12.066        | BB   | 0.3331      | 672.36462    | 30.99307     | 49.7149 |

Figure s13. HPLC spectrum of racemic phosphine sulfide 3.

### Table 1 Entry 2

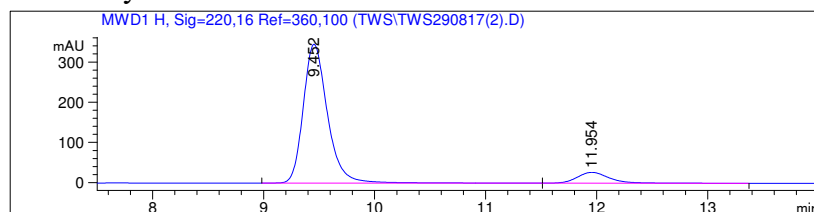

#### Area Percent Report

```
Sorted By      :      Signal
Multiplier:    :      1.0000
Dilution:      :      1.0000
Sample Amount: :      1.00000 [ng/ul] (not used in calc.)
Do not use Multiplier & Dilution Factor with ISTDs
```

Signal 1: MWD1 H, Sig=220,16 Ref=360,100

| Peak # | RetTime [min] | Type | Width [min] | Area [mAU*s] | Height [mAU] | Area %  |
|--------|---------------|------|-------------|--------------|--------------|---------|
| 1      | 9.452         | BV   | 0.2309      | 5236.42090   | 345.41492    | 90.4579 |
| 2      | 11.954        | VB   | 0.3099      | 552.37445    | 27.08693     | 9.5421  |

Figure s14. HPLC spectrum of chiral phosphine sulfide 3 in Table 1 Entry 2.

### Table 1 Entry 3

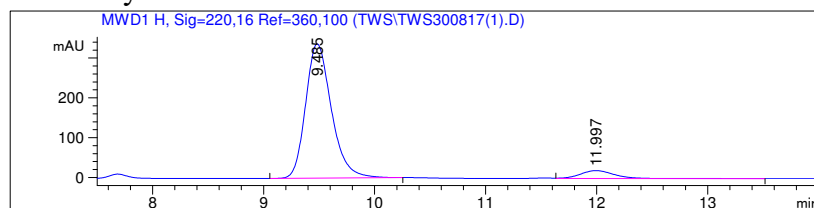

=====  
 Area Percent Report  
 =====

Sorted By : Signal  
 Multiplier: : 1.0000  
 Dilution: : 1.0000  
 Sample Amount: : 1.00000 [ng/ul] (not used in calc.)  
 Do not use Multiplier & Dilution Factor with ISTDs

Signal 1: MWD1 H, Sig=220,16 Ref=360,100

| Peak # | RetTime [min] | Type | Width [min] | Area [mAU*s] | Height [mAU] | Area %  |
|--------|---------------|------|-------------|--------------|--------------|---------|
| 1      | 9.485         | BB   | 0.2481      | 5438.37256   | 337.35065    | 92.7534 |
| 2      | 11.997        | VB   | 0.3276      | 424.88461    | 19.85819     | 7.2466  |

**Figure s15.** HPLC spectrum of chiral phosphine sulfide **3** in Table 1 Entry 3.

### Table 1 Entry 4

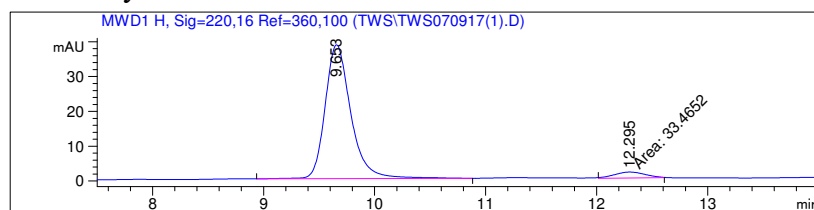

=====  
 Area Percent Report  
 =====

Sorted By : Signal  
 Multiplier: : 1.0000  
 Dilution: : 1.0000  
 Sample Amount: : 1.00000 [ng/ul] (not used in calc.)  
 Do not use Multiplier & Dilution Factor with ISTDs

Signal 1: MWD1 H, Sig=220,16 Ref=360,100

| Peak # | RetTime [min] | Type | Width [min] | Area [mAU*s] | Height [mAU] | Area %  |
|--------|---------------|------|-------------|--------------|--------------|---------|
| 1      | 9.653         | BB   | 0.2438      | 618.54633    | 38.43235     | 94.8674 |
| 2      | 12.295        | MM   | 0.3246      | 33.46520     | 1.71854      | 5.1326  |

**Figure s16.** HPLC spectrum of chiral phosphine sulfide **3** in Table 1 Entry 4.



### Table 1 Entry 4 (after a single recrystallization)

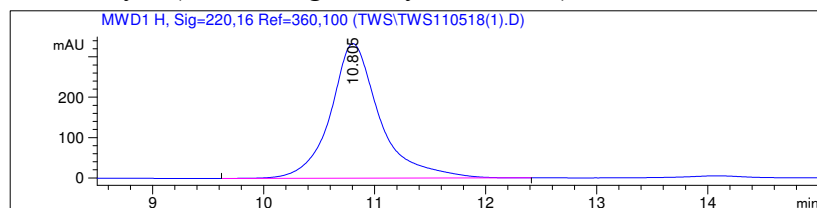

=====  
 Area Percent Report  
 =====

Sorted By : Signal  
 Multiplier: : 1.0000  
 Dilution: : 1.0000  
 Sample Amount: : 1.00000 [ng/ul] (not used in calc.)  
 Do not use Multiplier & Dilution Factor with ISTDs

Signal 1: MWD1 H, Sig=220,16 Ref=360,100

| Peak # | RetTime [min] | Type | Width [min] | Area [mAU*s] | Height [mAU] | Area %   |
|--------|---------------|------|-------------|--------------|--------------|----------|
| 1      | 10.805        | BB   | 0.4475      | 1.02788e4    | 333.54575    | 100.0000 |

**Figure s17.** HPLC spectrum of chiral phosphine sulfide **3** in Table 1 Entry 4 (after a single recrystallization).

### Table 1 Entry 5

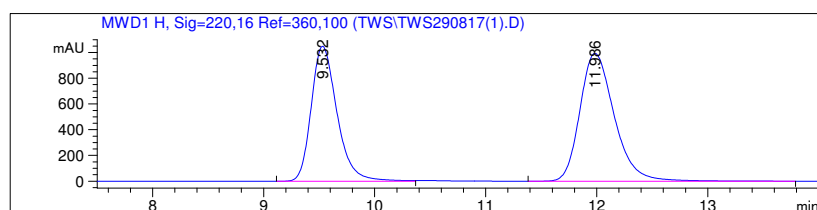

=====  
 Area Percent Report  
 =====

Sorted By : Signal  
 Multiplier: : 1.0000  
 Dilution: : 1.0000  
 Sample Amount: : 1.00000 [ng/ul] (not used in calc.)  
 Do not use Multiplier & Dilution Factor with ISTDs

Signal 1: MWD1 H, Sig=220,16 Ref=360,100

| Peak # | RetTime [min] | Type | Width [min] | Area [mAU*s] | Height [mAU] | Area %  |
|--------|---------------|------|-------------|--------------|--------------|---------|
| 1      | 9.532         | BV   | 0.2487      | 1.69641e4    | 1048.82837   | 44.2442 |
| 2      | 11.986        | BB   | 0.3308      | 2.13779e4    | 994.43610    | 55.7558 |

**Figure s18.** HPLC spectrum of chiral phosphine sulfide **3** in Table 1 Entry 5.

## Racemic arsine 4a

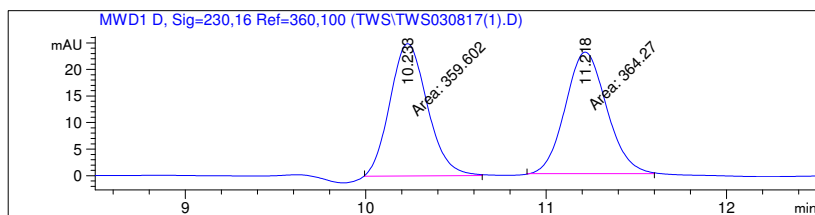

### Area Percent Report

Sorted By : Signal  
Multiplier: : 1.0000  
Dilution: : 1.0000  
Sample Amount: : 1.00000 [ng/ul] (not used in calc.)  
Do not use Multiplier & Dilution Factor with ISTDs

Signal 1: MWD1 D, Sig=230,16 Ref=360,100

| Peak # | RetTime [min] | Type | Width [min] | Area [mAU*s] | Height [mAU] | Area %  |
|--------|---------------|------|-------------|--------------|--------------|---------|
| 1      | 10.233        | MM   | 0.2404      | 359.60214    | 24.92695     | 49.6776 |
| 2      | 11.218        | MM   | 0.2654      | 364.27005    | 22.87154     | 50.3224 |

Figure s19. HPLC spectrum of racemic arsine 4a.

## Table 2 Entry 2

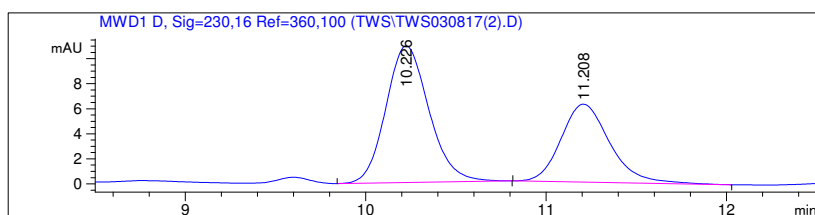

### Area Percent Report

Sorted By : Signal  
Multiplier: : 1.0000  
Dilution: : 1.0000  
Sample Amount: : 1.00000 [ng/ul] (not used in calc.)  
Do not use Multiplier & Dilution Factor with ISTDs

Signal 1: MWD1 D, Sig=230,16 Ref=360,100

| Peak # | RetTime [min] | Type | Width [min] | Area [mAU*s] | Height [mAU] | Area %  |
|--------|---------------|------|-------------|--------------|--------------|---------|
| 1      | 10.226        | BB   | 0.2571      | 180.68637    | 10.91400     | 60.6518 |
| 2      | 11.208        | BB   | 0.2896      | 117.22154    | 6.22750      | 39.3482 |

Figure s20. HPLC spectrum of chiral arsine 4a in Table 2 Entry 2.

### Table 2 Entry 3

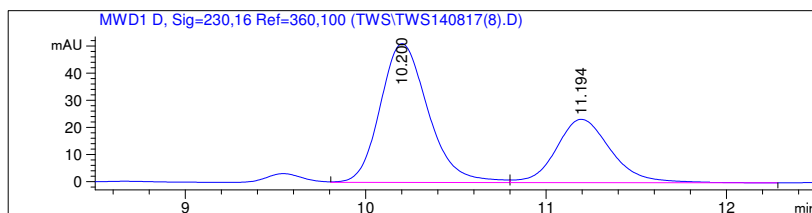

=====  
 Area Percent Report  
 =====

Sorted By : Signal  
 Multiplier: : 1.0000  
 Dilution: : 1.0000  
 Sample Amount: : 1.00000 [ng/ul] (not used in calc.)  
 Do not use Multiplier & Dilution Factor with ISTDs

Signal 1: MWD1 D, Sig=230,16 Ref=360,100

| Peak # | RetTime [min] | Type | Width [min] | Area [mAU*s] | Height [mAU] | Area %  |
|--------|---------------|------|-------------|--------------|--------------|---------|
| 1      | 10.200        | VV   | 0.2851      | 944.58893    | 51.22661     | 65.7096 |
| 2      | 11.194        | VB   | 0.3219      | 492.93210    | 23.38595     | 34.2904 |

**Figure s21.** HPLC spectrum of chiral arsine **4a** in Table 2 Entry 3.

### Table 2 Entry 4

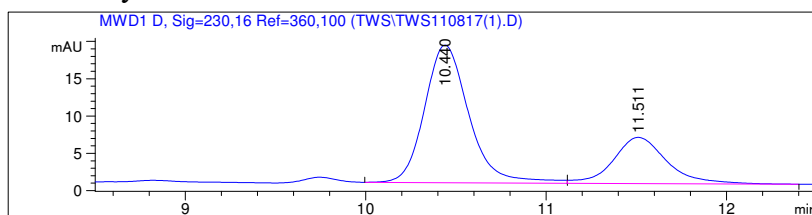

=====  
 Area Percent Report  
 =====

Sorted By : Signal  
 Multiplier: : 1.0000  
 Dilution: : 1.0000  
 Sample Amount: : 1.00000 [ng/ul] (not used in calc.)  
 Do not use Multiplier & Dilution Factor with ISTDs

Signal 1: MWD1 D, Sig=230,16 Ref=360,100

| Peak # | RetTime [min] | Type | Width [min] | Area [mAU*s] | Height [mAU] | Area %  |
|--------|---------------|------|-------------|--------------|--------------|---------|
| 1      | 10.440        | BV   | 0.2609      | 314.42728    | 18.44017     | 71.1585 |
| 2      | 11.511        | VB   | 0.3102      | 127.44170    | 6.18952      | 28.8415 |

**Figure s22.** HPLC spectrum of chiral arsine **4a** in Table 2 Entry 4.

### Table 2 Entry 5

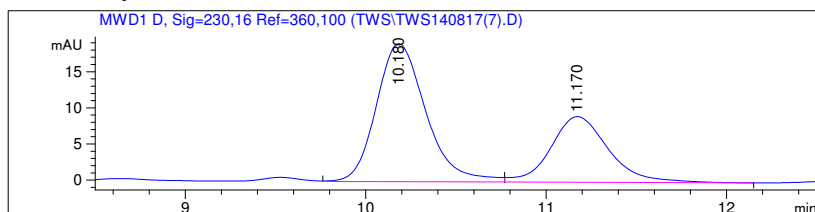

=====  
 Area Percent Report  
 =====

Sorted By : Signal  
 Multiplier: : 1.0000  
 Dilution: : 1.0000  
 Sample Amount: : 1.00000 [ng/ul] (not used in calc.)  
 Do not use Multiplier & Dilution Factor with ISTDs

Signal 1: MWD1 D, Sig=230,16 Ref=360,100

| Peak # | RetTime [min] | Type | Width [min] | Area [mAU*s] | Height [mAU] | Area %  |
|--------|---------------|------|-------------|--------------|--------------|---------|
| 1      | 10.180        | VV   | 0.2949      | 364.68622    | 19.08482     | 64.3233 |
| 2      | 11.170        | VB   | 0.3399      | 202.27214    | 9.08043      | 35.6767 |

Figure s23. HPLC spectrum of chiral arsine 4a in Table 2 Entry 5.

### Table 2 Entry 6

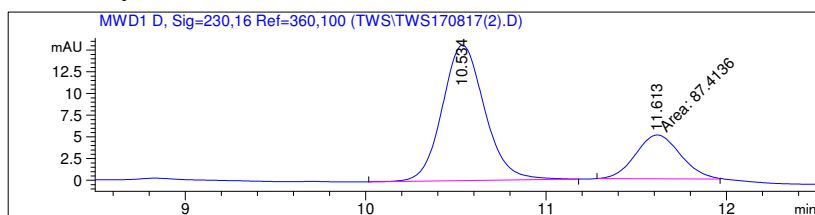

=====  
 Area Percent Report  
 =====

Sorted By : Signal  
 Multiplier: : 1.0000  
 Dilution: : 1.0000  
 Sample Amount: : 1.00000 [ng/ul] (not used in calc.)  
 Do not use Multiplier & Dilution Factor with ISTDs

Signal 1: MWD1 D, Sig=230,16 Ref=360,100

| Peak # | RetTime [min] | Type | Width [min] | Area [mAU*s] | Height [mAU] | Area %  |
|--------|---------------|------|-------------|--------------|--------------|---------|
| 1      | 10.534        | BB   | 0.2501      | 254.41805    | 15.61631     | 74.4279 |
| 2      | 11.613        | MM   | 0.2883      | 87.41356     | 5.05314      | 25.5721 |

Figure s24. HPLC spectrum of chiral arsine 4a in Table 2 Entry 6.

### Table 2 Entry 8

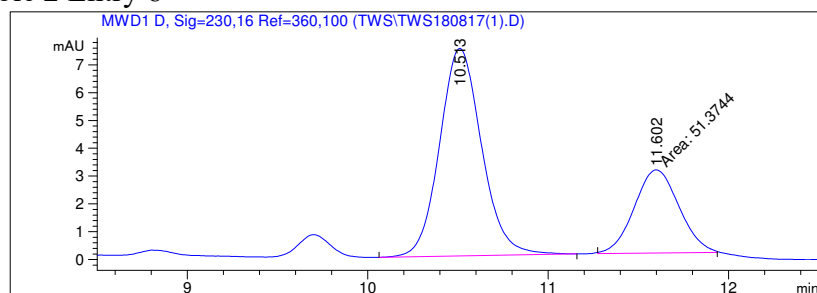

=====  
 Area Percent Report  
 =====

Sorted By : Signal  
 Multiplier: : 1.0000  
 Dilution: : 1.0000  
 Sample Amount: : 1.00000 [ng/ul] (not used in calc.)  
 Do not use Multiplier & Dilution Factor with ISTDs

Signal 1: MWD1 D, Sig=230,16 Ref=360,100

| Peak # | RetTime [min] | Type | Width [min] | Area [mAU*s] | Height [mAU] | Area %  |
|--------|---------------|------|-------------|--------------|--------------|---------|
| 1      | 10.513        | BB   | 0.2486      | 120.61105    | 7.46136      | 70.1286 |
| 2      | 11.602        | MM   | 0.2864      | 51.37437     | 2.98978      | 29.8714 |

Figure s25. HPLC spectrum of chiral arsine **4a** in Table 2 Entry 8.

### Table 2 Entry 9

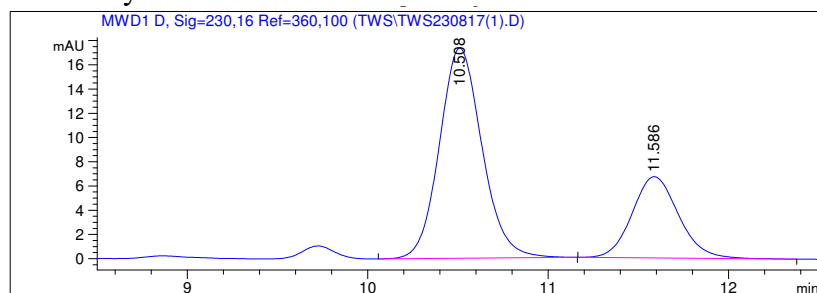

=====  
 Area Percent Report  
 =====

Sorted By : Signal  
 Multiplier: : 1.0000  
 Dilution: : 1.0000  
 Sample Amount: : 1.00000 [ng/ul] (not used in calc.)  
 Do not use Multiplier & Dilution Factor with ISTDs

Signal 1: MWD1 D, Sig=230,16 Ref=360,100

| Peak # | RetTime [min] | Type | Width [min] | Area [mAU*s] | Height [mAU] | Area %  |
|--------|---------------|------|-------------|--------------|--------------|---------|
| 1      | 10.508        | BB   | 0.2511      | 284.18588    | 17.35073     | 70.2801 |
| 2      | 11.586        | BB   | 0.2749      | 120.17574    | 6.71121      | 29.7199 |

Figure s26. HPLC spectrum of chiral arsine **4a** in Table 2 Entry 9.

### Table 3 Entry 2

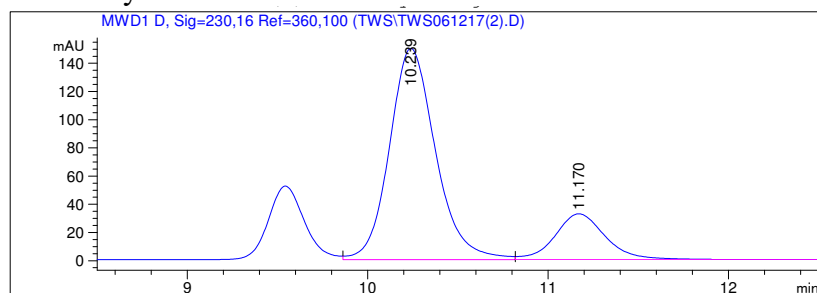

=====  
 Area Percent Report  
 =====

Sorted By : Signal  
 Multiplier: : 1.0000  
 Dilution: : 1.0000  
 Sample Amount: : 1.00000 [ng/ul] (not used in calc.)  
 Do not use Multiplier & Dilution Factor with ISTDs

Signal 1: MWD1 D, Sig=230,16 Ref=360,100

| Peak # | RetTime [min] | Type | Width [min] | Area [mAU*s] | Height [mAU] | Area %  |
|--------|---------------|------|-------------|--------------|--------------|---------|
| 1      | 10.239        | VV   | 0.2710      | 2657.53101   | 149.78130    | 80.7220 |
| 2      | 11.170        | VB   | 0.2959      | 634.67090    | 32.48362     | 19.2780 |

Figure s27. HPLC spectrum of chiral arsine 4a in Table 3 Entry 2

### Table 3 Entry 3

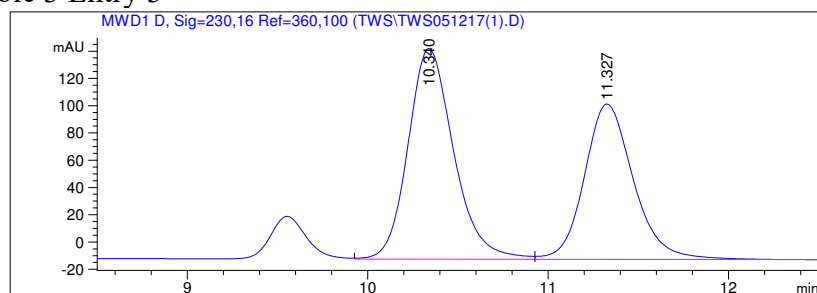

=====  
 Area Percent Report  
 =====

Sorted By : Signal  
 Multiplier: : 1.0000  
 Dilution: : 1.0000  
 Sample Amount: : 1.00000 [ng/ul] (not used in calc.)  
 Do not use Multiplier & Dilution Factor with ISTDs

Signal 1: MWD1 D, Sig=230,16 Ref=360,100

| Peak # | RetTime [min] | Type | Width [min] | Area [mAU*s] | Height [mAU] | Area %  |
|--------|---------------|------|-------------|--------------|--------------|---------|
| 1      | 10.340        | VV   | 0.2690      | 2715.93335   | 154.54321    | 55.6559 |
| 2      | 11.327        | VBA  | 0.2874      | 2163.93628   | 114.02063    | 44.3441 |

Figure s28. HPLC spectrum of chiral arsine 4a in Table 3 Entry 3

### Table 3 Entry 4

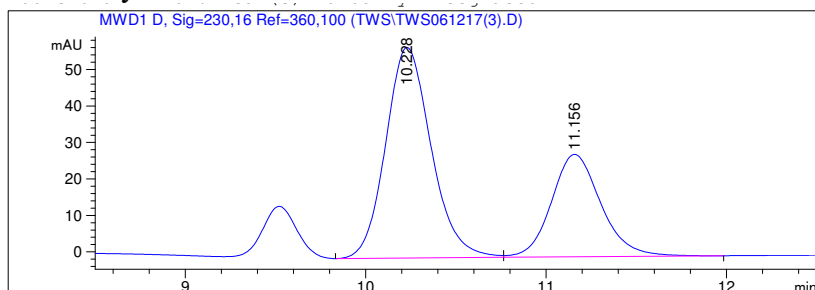

=====  
 Area Percent Report  
 =====

Sorted By : Signal  
 Multiplier: : 1.0000  
 Dilution: : 1.0000  
 Sample Amount: : 1.00000 [ng/ul] (not used in calc.)  
 Do not use Multiplier & Dilution Factor with ISTDs

Signal 1: MWD1 D, Sig=230,16 Ref=360,100

| Peak # | RetTime [min] | Type | Width [min] | Area [mAU*s] | Height [mAU] | Area %  |
|--------|---------------|------|-------------|--------------|--------------|---------|
| 1      | 10.228        | BV   | 0.2682      | 1011.07990   | 57.77390     | 65.3677 |
| 2      | 11.156        | VB   | 0.2904      | 535.67664    | 28.09463     | 34.6323 |

Figure s29. HPLC spectrum of chiral arsine **4a** in Table 3 Entry 4.

### Table 3 Entry 5

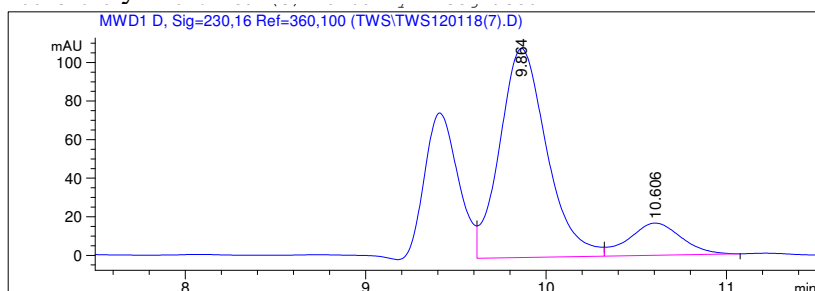

=====  
 Area Percent Report  
 =====

Sorted By : Signal  
 Multiplier: : 1.0000  
 Dilution: : 1.0000  
 Sample Amount: : 1.00000 [ng/ul] (not used in calc.)  
 Do not use Multiplier & Dilution Factor with ISTDs

Signal 1: MWD1 D, Sig=230,16 Ref=360,100

| Peak # | RetTime [min] | Type | Width [min] | Area [mAU*s] | Height [mAU] | Area %  |
|--------|---------------|------|-------------|--------------|--------------|---------|
| 1      | 9.864         | VV   | 0.2744      | 1955.56848   | 108.45296    | 85.3456 |
| 2      | 10.606        | VB   | 0.3028      | 335.78290    | 16.68306     | 14.6544 |

Figure s30. HPLC spectrum of chiral arsine **4a** in Table 3 Entry 5.

### Table 3 Entry 6

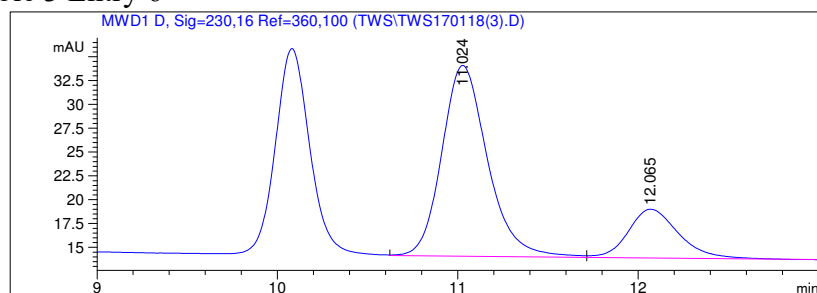

#### Area Percent Report

Sorted By : Signal  
Multiplier: : 1.0000  
Dilution: : 1.0000  
Sample Amount: : 1.00000 [ng/ul] (not used in calc.)  
Do not use Multiplier & Dilution Factor with ISTDs

Signal 1: MWD1 D, Sig=230,16 Ref=360,100

| Peak # | RetTime [min] | Type | Width [min] | Area [mAU*s] | Height [mAU] | Area %  |
|--------|---------------|------|-------------|--------------|--------------|---------|
| 1      | 11.024        | VV   | 0.2674      | 352.33932    | 20.01755     | 77.8769 |
| 2      | 12.065        | VBA  | 0.2936      | 100.09152    | 5.12976      | 22.1231 |

Figure s31. HPLC spectrum of chiral arsine **4a** in Table 3 Entry 6.

### Table 3 Entry 7

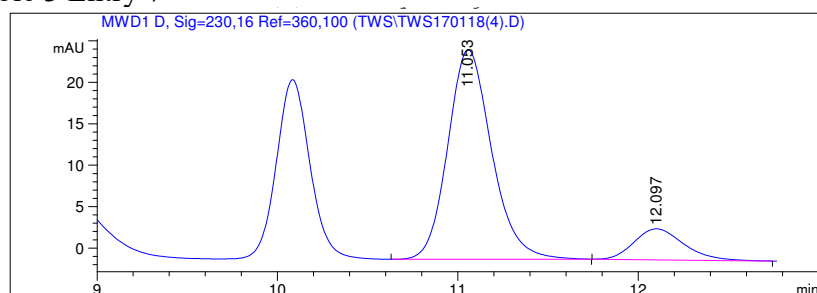

#### Area Percent Report

Sorted By : Signal  
Multiplier: : 1.0000  
Dilution: : 1.0000  
Sample Amount: : 1.00000 [ng/ul] (not used in calc.)  
Do not use Multiplier & Dilution Factor with ISTDs

Signal 1: MWD1 D, Sig=230,16 Ref=360,100

| Peak # | RetTime [min] | Type | Width [min] | Area [mAU*s] | Height [mAU] | Area %  |
|--------|---------------|------|-------------|--------------|--------------|---------|
| 1      | 11.053        | BB   | 0.2609      | 426.58368    | 25.27765     | 85.6682 |
| 2      | 12.097        | BBA  | 0.2907      | 71.36488     | 3.73946      | 14.3318 |

Figure s32. HPLC spectrum of chiral arsine **4a** in Table 3 Entry 7.



### Table 3 Entry 8

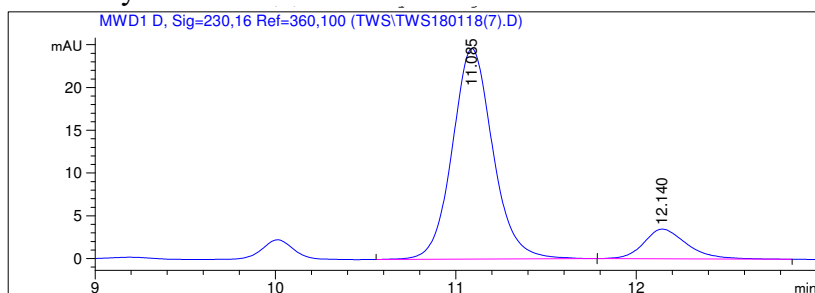

#### Area Percent Report

Sorted By : Signal  
Multiplier: : 1.0000  
Dilution: : 1.0000  
Sample Amount: : 1.00000 [ng/ul] (not used in calc.)  
Do not use Multiplier & Dilution Factor with ISTDs

Signal 1: MWD1 D, Sig=230,16 Ref=360,100

| Peak # | RetTime [min] | Type | Width [min] | Area [mAU*s] | Height [mAU] | Area %  |
|--------|---------------|------|-------------|--------------|--------------|---------|
| 1      | 11.085        | BB   | 0.2377      | 383.45328    | 24.62228     | 86.9083 |
| 2      | 12.140        | BB   | 0.2437      | 57.76253     | 3.47867      | 13.0917 |

Figure s33. HPLC spectrum of chiral arsine **4a** in Table 3 Entry 8.

### Table 3 Entry 9

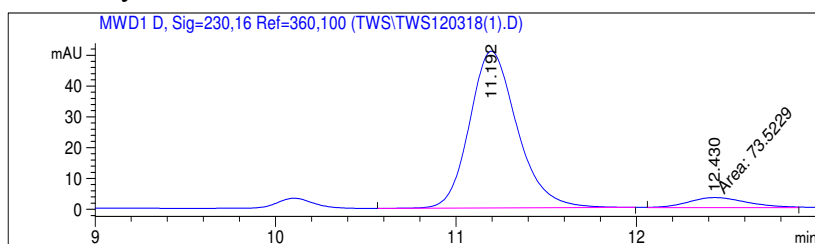

#### Area Percent Report

Sorted By : Signal  
Multiplier: : 1.0000  
Dilution: : 1.0000  
Sample Amount: : 1.00000 [ng/ul] (not used in calc.)  
Do not use Multiplier & Dilution Factor with ISTDs

Signal 1: MWD1 D, Sig=230,16 Ref=360,100

| Peak # | RetTime [min] | Type | Width [min] | Area [mAU*s] | Height [mAU] | Area %  |
|--------|---------------|------|-------------|--------------|--------------|---------|
| 1      | 11.192        | BB   | 0.2795      | 930.84247    | 50.85662     | 92.6797 |
| 2      | 12.430        | MM   | 0.3760      | 73.52291     | 3.25937      | 7.3203  |

Figure s34. HPLC spectrum of chiral arsine **4a** in Table 3 Entry 9.

### Table 3 Entry 10

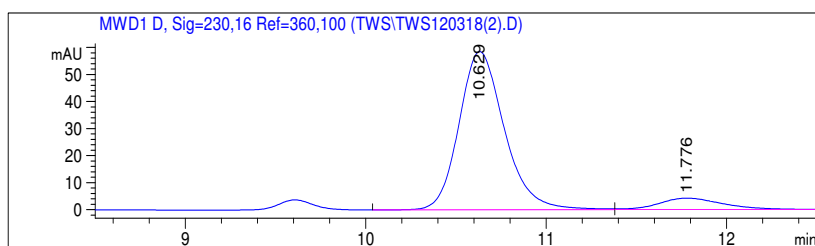

=====  
 Area Percent Report  
 =====

Sorted By : Signal  
 Multiplier: : 1.0000  
 Dilution: : 1.0000  
 Sample Amount: : 1.00000 [ng/ul] (not used in calc.)  
 Do not use Multiplier & Dilution Factor with ISTDs

Signal 1: MWD1 D, Sig=230,16 Ref=360,100

| Peak # | RetTime [min] | Type | Width [min] | Area [mAU*s] | Height [mAU] | Area %  |
|--------|---------------|------|-------------|--------------|--------------|---------|
| 1      | 10.629        | BV   | 0.2681      | 1024.78076   | 58.58186     | 90.6031 |
| 2      | 11.776        | VB   | 0.3648      | 106.28550    | 4.26389      | 9.3969  |

**Figure s35.** HPLC spectrum of chiral arsine **4a** in Table 3 Entry 10.

### Table 3 Entry 11

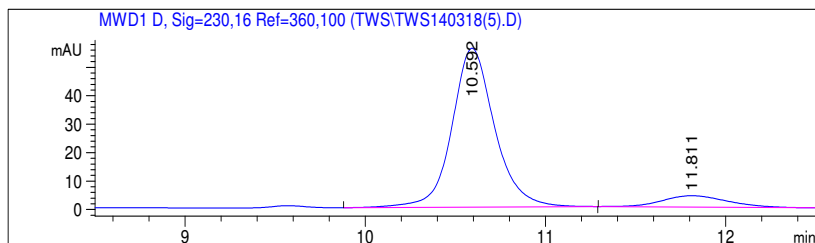

=====  
 Area Percent Report  
 =====

Sorted By : Signal  
 Multiplier: : 1.0000  
 Dilution: : 1.0000  
 Sample Amount: : 1.00000 [ng/ul] (not used in calc.)  
 Do not use Multiplier & Dilution Factor with ISTDs

Signal 1: MWD1 D, Sig=230,16 Ref=360,100

| Peak # | RetTime [min] | Type | Width [min] | Area [mAU*s] | Height [mAU] | Area %  |
|--------|---------------|------|-------------|--------------|--------------|---------|
| 1      | 10.592        | BB   | 0.2481      | 920.29401    | 55.89064     | 90.1559 |
| 2      | 11.811        | BB   | 0.3817      | 100.48656    | 3.99135      | 9.8441  |

**Figure s36.** HPLC spectrum of chiral arsine **4a** in Table 3 Entry 11.

### Table 3 Entry 12

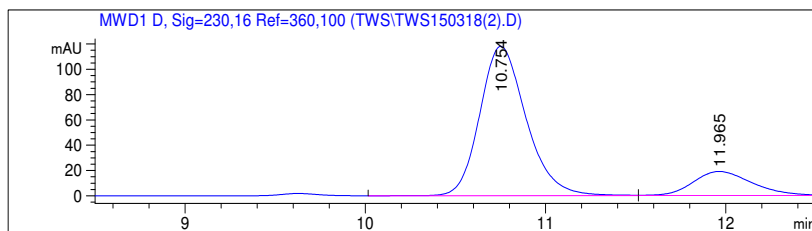

=====  
 Area Percent Report  
 =====

Sorted By : Signal  
 Multiplier: : 1.0000  
 Dilution: : 1.0000  
 Sample Amount: : 1.00000 [ng/ul] (not used in calc.)  
 Do not use Multiplier & Dilution Factor with ISTDs

Signal 1: MWD1 D, Sig=230,16 Ref=360,100

| Peak # | RetTime [min] | Type | Width [min] | Area [mAU*s] | Height [mAU] | Area %  |
|--------|---------------|------|-------------|--------------|--------------|---------|
| 1      | 10.754        | BV   | 0.2728      | 2113.70630   | 118.08288    | 82.5503 |
| 2      | 11.965        | VB   | 0.3562      | 446.80212    | 19.15246     | 17.4497 |

Figure s37. HPLC spectrum of chiral arsine **4a** in Table 3 Entry 12.

Table 3 Entry 13

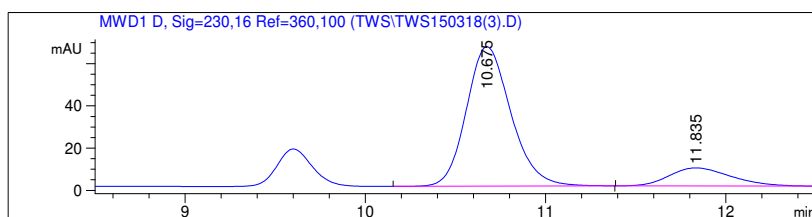

=====  
 Area Percent Report  
 =====

Sorted By : Signal  
 Multiplier: : 1.0000  
 Dilution: : 1.0000  
 Sample Amount: : 1.00000 [ng/ul] (not used in calc.)  
 Do not use Multiplier & Dilution Factor with ISTDs

Signal 1: MWD1 D, Sig=230,16 Ref=360,100

| Peak # | RetTime [min] | Type | Width [min] | Area [mAU*s] | Height [mAU] | Area %  |
|--------|---------------|------|-------------|--------------|--------------|---------|
| 1      | 10.675        | BB   | 0.2640      | 1132.96399   | 66.09711     | 84.7020 |
| 2      | 11.835        | BB   | 0.3667      | 204.62436    | 8.56656      | 15.2980 |

Figure s38. HPLC spectrum of chiral arsine **4a** in Table 3 Entry 13.

Table 3 Entry 14

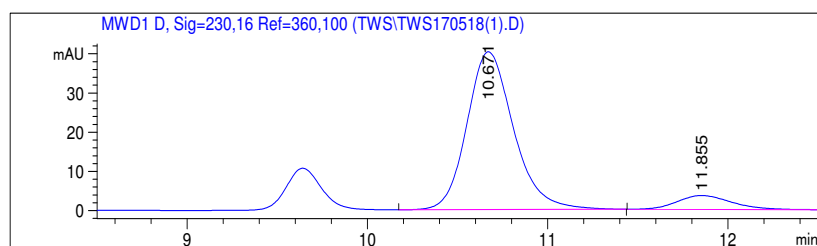

=====  
 Area Percent Report  
 =====

Sorted By : Signal  
 Multiplier: : 1.0000  
 Dilution: : 1.0000  
 Sample Amount: : 1.00000 [ng/ul] (not used in calc.)  
 Do not use Multiplier & Dilution Factor with ISTDs

Signal 1: MWD1 D, Sig=230,16 Ref=360,100

| Peak # | RetTime [min] | Type | Width [min] | Area [mAU*s] | Height [mAU] | Area %  |
|--------|---------------|------|-------------|--------------|--------------|---------|
| 1      | 10.671        | BB   | 0.2736      | 723.66382    | 40.27212     | 90.5503 |
| 2      | 11.855        | BB   | 0.3182      | 75.52071     | 3.54993      | 9.4497  |

Figure s39. HPLC spectrum of chiral arsine **4a** in Table 3 Entry 14.

Table 3 Entry 15

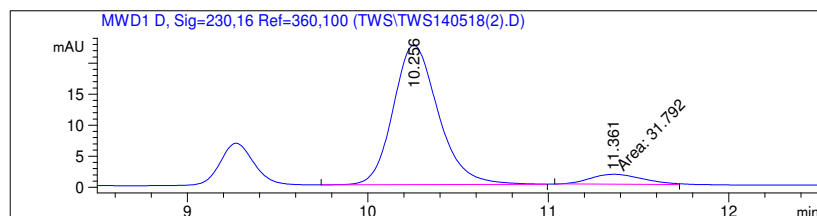

=====  
 Area Percent Report  
 =====

Sorted By : Signal  
 Multiplier: : 1.0000  
 Dilution: : 1.0000  
 Sample Amount: : 1.00000 [ng/ul] (not used in calc.)  
 Do not use Multiplier & Dilution Factor with ISTDs

Signal 1: MWD1 D, Sig=230,16 Ref=360,100

| Peak # | RetTime [min] | Type | Width [min] | Area [mAU*s] | Height [mAU] | Area %  |
|--------|---------------|------|-------------|--------------|--------------|---------|
| 1      | 10.256        | BB   | 0.2663      | 390.04480    | 22.49098     | 92.4634 |
| 2      | 11.361        | MM   | 0.3342      | 31.79202     | 1.58542      | 7.5366  |

Figure s40. HPLC spectrum of chiral arsine **4a** in Table 3 Entry 15.

### Table 4 Entry 1

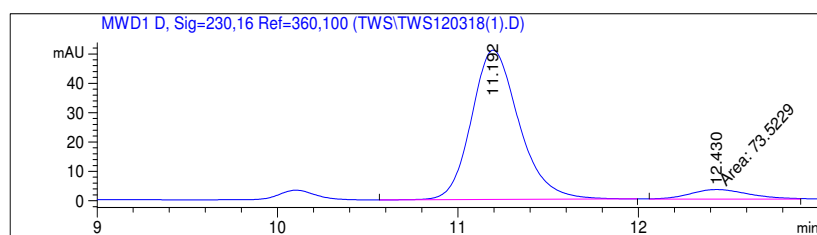

=====  
 Area Percent Report  
 =====

Sorted By : Signal  
 Multiplier: : 1.0000  
 Dilution: : 1.0000  
 Sample Amount: : 1.00000 [ng/ul] (not used in calc.)  
 Do not use Multiplier & Dilution Factor with ISTDs

Signal 1: MWD1 D, Sig=230,16 Ref=360,100

| Peak # | RetTime [min] | Type | Width [min] | Area [mAU*s] | Height [mAU] | Area %  |
|--------|---------------|------|-------------|--------------|--------------|---------|
| 1      | 11.192        | BB   | 0.2795      | 930.84247    | 50.85662     | 92.6797 |
| 2      | 12.430        | MM   | 0.3760      | 73.52291     | 3.25937      | 7.3203  |

**Figure s41.** HPLC spectrum of chiral arsine **4a** in Table 4 Entry 1.

### Racemic arsine **4b**

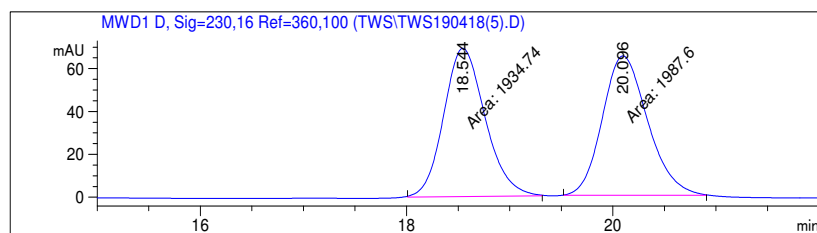

=====  
 Area Percent Report  
 =====

Sorted By : Signal  
 Multiplier: : 1.0000  
 Dilution: : 1.0000  
 Sample Amount: : 1.00000 [ng/ul] (not used in calc.)  
 Do not use Multiplier & Dilution Factor with ISTDs

Signal 1: MWD1 D, Sig=230,16 Ref=360,100

| Peak # | RetTime [min] | Type | Width [min] | Area [mAU*s] | Height [mAU] | Area %  |
|--------|---------------|------|-------------|--------------|--------------|---------|
| 1      | 18.544        | MM   | 0.4662      | 1934.73596   | 69.16474     | 49.3261 |
| 2      | 20.096        | MM   | 0.5096      | 1987.59875   | 65.00404     | 50.6739 |

**Figure s42.** HPLC spectrum of racemic arsine **4b**.

## Table 4 Entry 2

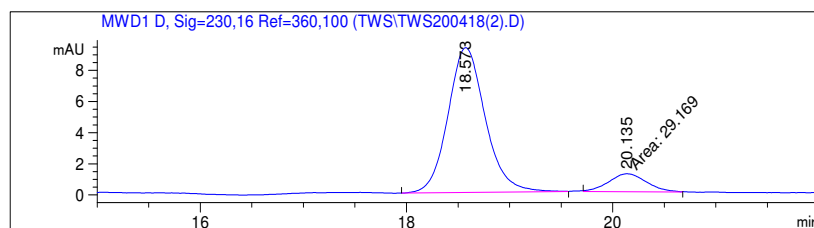

### Area Percent Report

```
Sorted By      :      Signal
Multiplier:    :      1.0000
Dilution:      :      1.0000
Sample Amount: :      1.00000 [ng/ul] (not used in calc.)
Do not use Multiplier & Dilution Factor with ISTDs
```

Signal 1: MWD1 D, Sig=230,16 Ref=360,100

| Peak # | RetTime [min] | Type | Width [min] | Area [mAU*s] | Height [mAU] | Area %  |
|--------|---------------|------|-------------|--------------|--------------|---------|
| 1      | 18.573        | BB   | 0.3805      | 233.31445    | 9.30440      | 88.8873 |
| 2      | 20.135        | MM   | 0.4230      | 29.16898     | 1.14929      | 11.1127 |

**Figure s43.** HPLC spectrum of chiral arsine **4b** in Table 4 Entry 2.

## Racemic arsine **4c**

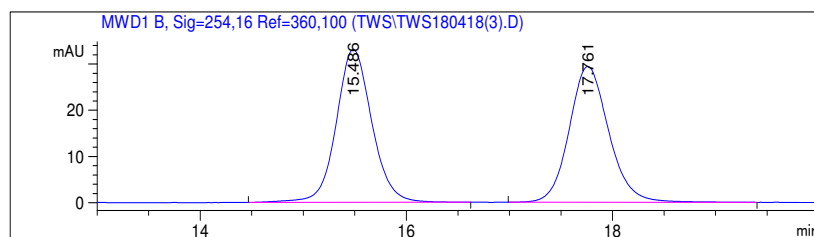

### Area Percent Report

```
Sorted By      :      Signal
Multiplier:    :      1.0000
Dilution:      :      1.0000
Sample Amount: :      1.00000 [ng/ul] (not used in calc.)
Do not use Multiplier & Dilution Factor with ISTDs
```

Signal 1: MWD1 B, Sig=254,16 Ref=360,100

| Peak # | RetTime [min] | Type | Width [min] | Area [mAU*s] | Height [mAU] | Area %  |
|--------|---------------|------|-------------|--------------|--------------|---------|
| 1      | 15.486        | BB   | 0.3658      | 793.76508    | 33.10006     | 50.3075 |
| 2      | 17.761        | BB   | 0.4054      | 784.06049    | 29.37558     | 49.6925 |

**Figure s44.** HPLC spectrum of racemic arsine **4c**.

### Table 4 Entry 3

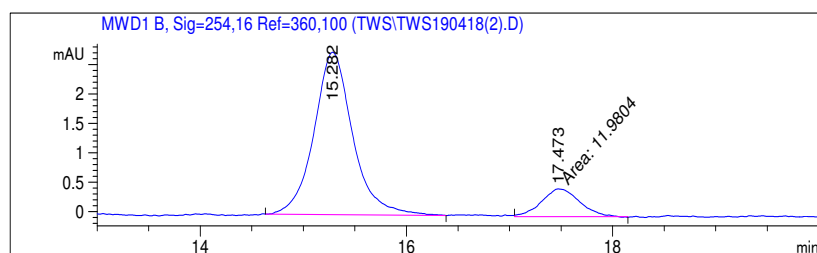

=====  
 Area Percent Report  
 =====

Sorted By : Signal  
 Multiplier: : 1.0000  
 Dilution: : 1.0000  
 Sample Amount: : 1.00000 [ng/ul] (not used in calc.)  
 Do not use Multiplier & Dilution Factor with ISTDs

Signal 1: MWD1 B, Sig=254,16 Ref=360,100

| Peak # | RetTime [min] | Type | Width [min] | Area [mAU*s] | Height [mAU] | Area %  |
|--------|---------------|------|-------------|--------------|--------------|---------|
| 1      | 15.282        | BB   | 0.3804      | 72.08023     | 2.76236      | 85.7479 |
| 2      | 17.473        | MM   | 0.4258      | 11.98039     | 4.68937e-1   | 14.2521 |

Figure s45. HPLC spectrum of chiral arsine **4c** in Table 4 Entry 3.

### Racemic arsine **4d**

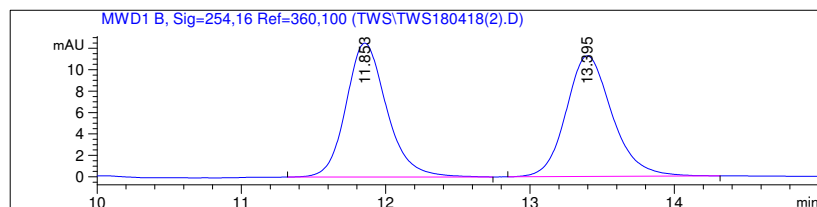

=====  
 Area Percent Report  
 =====

Sorted By : Signal  
 Multiplier: : 1.0000  
 Dilution: : 1.0000  
 Sample Amount: : 1.00000 [ng/ul] (not used in calc.)  
 Do not use Multiplier & Dilution Factor with ISTDs

Signal 1: MWD1 B, Sig=254,16 Ref=360,100

| Peak # | RetTime [min] | Type | Width [min] | Area [mAU*s] | Height [mAU] | Area %  |
|--------|---------------|------|-------------|--------------|--------------|---------|
| 1      | 11.853        | BB   | 0.2989      | 245.60713    | 12.51644     | 49.5914 |
| 2      | 13.395        | BB   | 0.3383      | 249.65414    | 11.27784     | 50.4086 |

Figure s46. HPLC spectrum of racemic arsine **4d**.

### Table 4 Entry 4

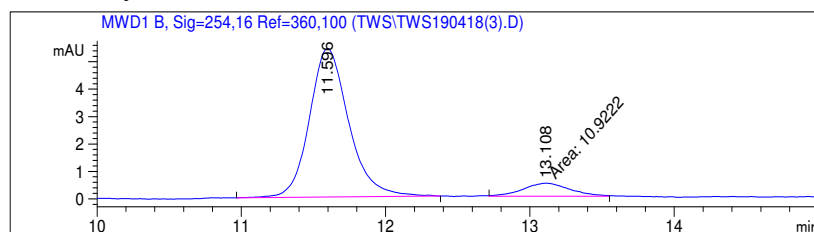

=====  
 Area Percent Report  
 =====

Sorted By : Signal  
 Multiplier: : 1.0000  
 Dilution: : 1.0000  
 Sample Amount: : 1.00000 [ng/ul] (not used in calc.)  
 Do not use Multiplier & Dilution Factor with ISTDs

Signal 1: MWD1 B, Sig=254,16 Ref=360,100

| Peak # | RetTime [min] | Type | Width [min] | Area [mAU*s] | Height [mAU] | Area %  |
|--------|---------------|------|-------------|--------------|--------------|---------|
| 1      | 11.596        | BB   | 0.2868      | 102.58904    | 5.41991      | 90.3779 |
| 2      | 13.108        | MM   | 0.3793      | 10.92220     | 4.79910e-1   | 9.6221  |

**Figure s47.** HPLC spectrum of chiral arsine **4d** in Table 4 Entry 4.

### Racemic arsine **4e**

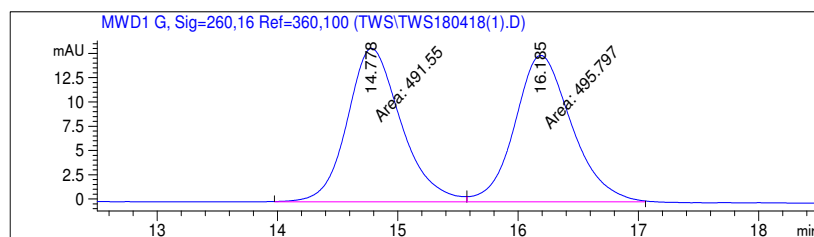

=====  
 Area Percent Report  
 =====

Sorted By : Signal  
 Multiplier: : 1.0000  
 Dilution: : 1.0000  
 Sample Amount: : 1.00000 [ng/ul] (not used in calc.)  
 Do not use Multiplier & Dilution Factor with ISTDs

Signal 1: MWD1 G, Sig=260,16 Ref=360,100

| Peak # | RetTime [min] | Type | Width [min] | Area [mAU*s] | Height [mAU] | Area %  |
|--------|---------------|------|-------------|--------------|--------------|---------|
| 1      | 14.778        | MF   | 0.5186      | 491.55026    | 15.79876     | 49.7849 |
| 2      | 16.185        | FM   | 0.5477      | 495.79736    | 15.08859     | 50.2151 |

**Figure s48.** HPLC spectrum of racemic arsine **4e**.



### Table 4 Entry 5

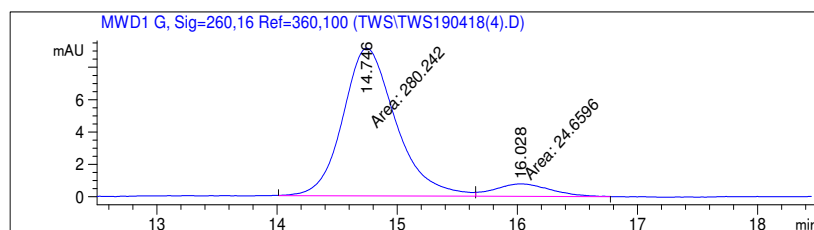

=====  
 Area Percent Report  
 =====

Sorted By : Signal  
 Multiplier: : 1.0000  
 Dilution: : 1.0000  
 Sample Amount: : 1.00000 [ng/ul] (not used in calc.)  
 Do not use Multiplier & Dilution Factor with ISTDs

Signal 1: MWD1 G, Sig=260,16 Ref=360,100

| Peak # | RetTime [min] | Type | Width [min] | Area [mAU*s] | Height [mAU] | Area %  |
|--------|---------------|------|-------------|--------------|--------------|---------|
| 1      | 14.746        | MF   | 0.5115      | 280.24222    | 9.13157      | 91.9123 |
| 2      | 16.028        | FM   | 0.5370      | 24.65956     | 7.65356e-1   | 8.0877  |

Figure s49. HPLC spectrum of chiral arsine 4e in Table 4 Entry 5.

### Table s1 Entry 10

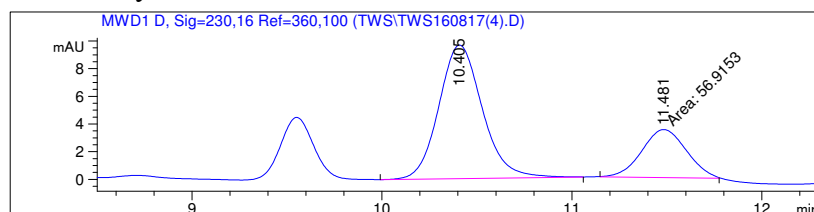

=====  
 Area Percent Report  
 =====

Sorted By : Signal  
 Multiplier: : 1.0000  
 Dilution: : 1.0000  
 Sample Amount: : 1.00000 [ng/ul] (not used in calc.)  
 Do not use Multiplier & Dilution Factor with ISTDs

Signal 1: MWD1 D, Sig=230,16 Ref=360,100

| Peak # | RetTime [min] | Type | Width [min] | Area [mAU*s] | Height [mAU] | Area %  |
|--------|---------------|------|-------------|--------------|--------------|---------|
| 1      | 10.405        | BB   | 0.2435      | 153.55287    | 9.65874      | 72.9577 |
| 2      | 11.481        | MM   | 0.2728      | 56.91534     | 3.47676      | 27.0423 |

Figure s50. HPLC spectrum of chiral arsine 4a in Table s1 Entry 10.

### Table s1 Entry 11

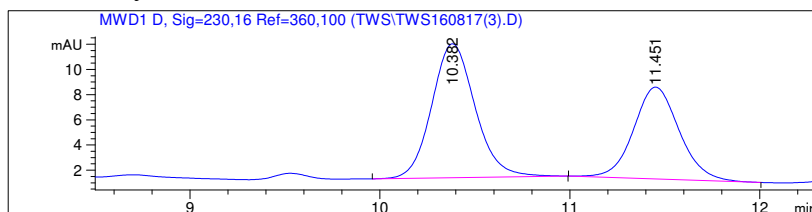

=====  
 Area Percent Report  
 =====

Sorted By : Signal  
 Multiplier: : 1.0000  
 Dilution: : 1.0000  
 Sample Amount: : 1.00000 [ng/ul] (not used in calc.)  
 Do not use Multiplier & Dilution Factor with ISTDs

Signal 1: MWD1 D, Sig=230,16 Ref=360,100

| Peak # | RetTime [min] | Type | Width [min] | Area [mAU*s] | Height [mAU] | Area %  |
|--------|---------------|------|-------------|--------------|--------------|---------|
| 1      | 10.382        | BB   | 0.2432      | 168.84918    | 10.63442     | 57.9949 |
| 2      | 11.451        | BB   | 0.2555      | 122.29566    | 7.29812      | 42.0051 |

**Figure s51.** HPLC spectrum of chiral arsine **4a** in Table s1 Entry 11.

### Table s1 Entry 15

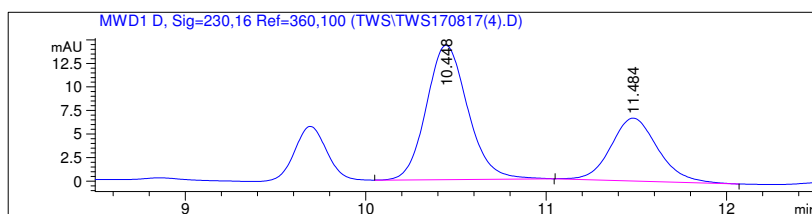

=====  
 Area Percent Report  
 =====

Sorted By : Signal  
 Multiplier: : 1.0000  
 Dilution: : 1.0000  
 Sample Amount: : 1.00000 [ng/ul] (not used in calc.)  
 Do not use Multiplier & Dilution Factor with ISTDs

Signal 1: MWD1 D, Sig=230,16 Ref=360,100

| Peak # | RetTime [min] | Type | Width [min] | Area [mAU*s] | Height [mAU] | Area %  |
|--------|---------------|------|-------------|--------------|--------------|---------|
| 1      | 10.448        | BB   | 0.2459      | 227.12941    | 14.25611     | 65.2678 |
| 2      | 11.484        | BB   | 0.2772      | 120.86658    | 6.67528      | 34.7322 |

**Figure s52.** HPLC spectrum of chiral arsine **4a** in Table s1 Entry 15

### Table s2 Entry 1

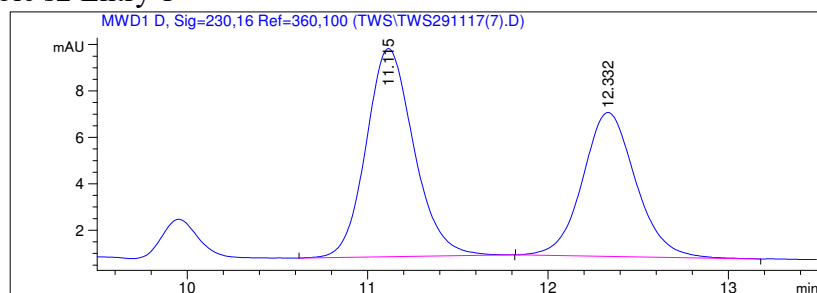

=====  
 Area Percent Report  
 =====

Sorted By : Signal  
 Multiplier: : 1.0000  
 Dilution: : 1.0000  
 Sample Amount: : 1.00000 [ng/ul] (not used in calc.)  
 Do not use Multiplier & Dilution Factor with ISTDs

Signal 1: MWD1 D, Sig=230,16 Ref=360,100

| Peak # | RetTime [min] | Type | Width [min] | Area [mAU*s] | Height [mAU] | Area %  |
|--------|---------------|------|-------------|--------------|--------------|---------|
| 1      | 11.115        | BB   | 0.2802      | 164.69316    | 8.97036      | 56.4613 |
| 2      | 12.332        | BB   | 0.3109      | 126.99919    | 6.20227      | 43.5387 |

Figure s53. HPLC spectrum of chiral arsine **4a** in Table s2 Entry 1.

### Table s2 Entry 2

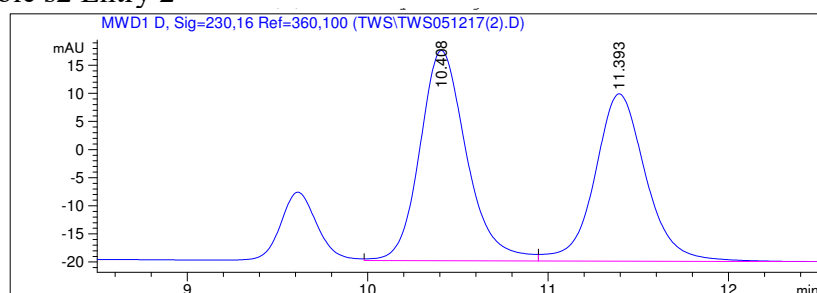

=====  
 Area Percent Report  
 =====

Sorted By : Signal  
 Multiplier: : 1.0000  
 Dilution: : 1.0000  
 Sample Amount: : 1.00000 [ng/ul] (not used in calc.)  
 Do not use Multiplier & Dilution Factor with ISTDs

Signal 1: MWD1 D, Sig=230,16 Ref=360,100

| Peak # | RetTime [min] | Type | Width [min] | Area [mAU*s] | Height [mAU] | Area %  |
|--------|---------------|------|-------------|--------------|--------------|---------|
| 1      | 10.408        | VV   | 0.2737      | 672.43286    | 37.40774     | 53.3875 |
| 2      | 11.393        | VB   | 0.2980      | 587.09839    | 29.77983     | 46.6125 |

Figure s54. HPLC spectrum of chiral arsine **4a** in Table s2 Entry 2

### Table s2 Entry 3

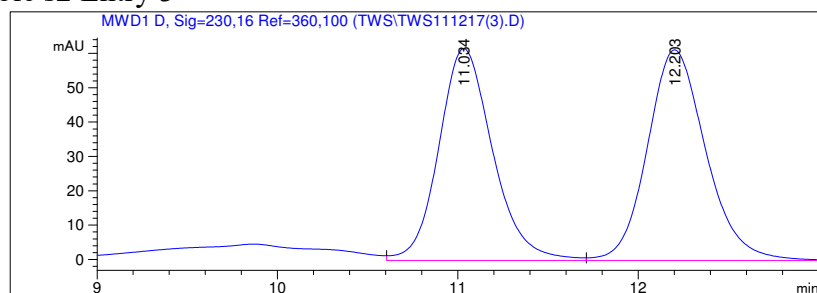

#### Area Percent Report

Sorted By : Signal  
Multiplier: : 1.0000  
Dilution: : 1.0000  
Sample Amount: : 1.00000 [ng/ul] (not used in calc.)  
Do not use Multiplier & Dilution Factor with ISTDs

Signal 1: MWD1 D, Sig=230,16 Ref=360,100

| Peak # | RetTime [min] | Type | Width [min] | Area [mAU*s] | Height [mAU] | Area %  |
|--------|---------------|------|-------------|--------------|--------------|---------|
| 1      | 11.034        | VV   | 0.3159      | 1279.54993   | 61.70493     | 48.1300 |
| 2      | 12.203        | VB   | 0.3445      | 1378.97729   | 61.27803     | 51.8700 |

Figure s55. HPLC spectrum of chiral arsine **4a** in Table s2 Entry 3

### Table s2 Entry 4

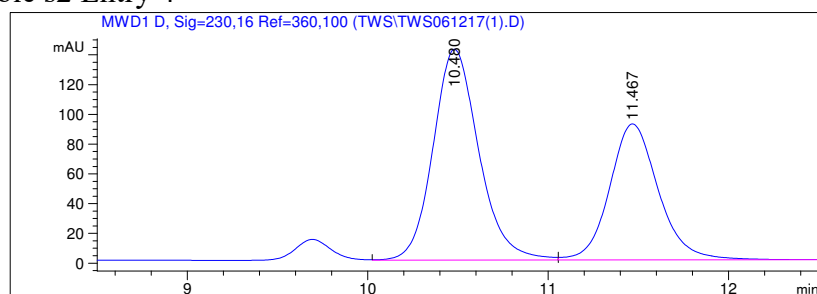

#### Area Percent Report

Sorted By : Signal  
Multiplier: : 1.0000  
Dilution: : 1.0000  
Sample Amount: : 1.00000 [ng/ul] (not used in calc.)  
Do not use Multiplier & Dilution Factor with ISTDs

Signal 1: MWD1 D, Sig=230,16 Ref=360,100

| Peak # | RetTime [min] | Type | Width [min] | Area [mAU*s] | Height [mAU] | Area %  |
|--------|---------------|------|-------------|--------------|--------------|---------|
| 1      | 10.480        | VV   | 0.2697      | 2500.72485   | 141.81233    | 59.1991 |
| 2      | 11.467        | VB   | 0.2857      | 1723.53760   | 91.52664     | 40.8009 |

Figure s56. HPLC spectrum of chiral arsine **4a** in Table s2 Entry 4

### Table s2 Entry 5

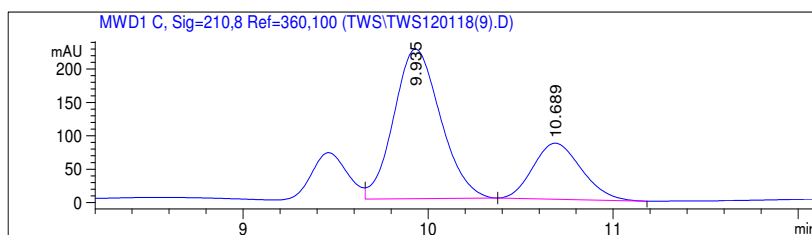

=====  
 Area Percent Report  
 =====

Sorted By : Signal  
 Multiplier: : 1.0000  
 Dilution: : 1.0000  
 Sample Amount: : 1.00000 [ng/ul] (not used in calc.)  
 Do not use Multiplier & Dilution Factor with ISTDs

Signal 1: MWD1 C, Sig=210,8 Ref=360,100

| Peak # | RetTime [min] | Type | Width [min] | Area [mAU*s] | Height [mAU] | Area %  |
|--------|---------------|------|-------------|--------------|--------------|---------|
| 1      | 9.935         | VB   | 0.2706      | 3931.81372   | 224.24200    | 72.0836 |
| 2      | 10.689        | BB   | 0.2817      | 1522.70618   | 83.90736     | 27.9164 |

Figure s57. HPLC spectrum of chiral arsine 4a in Table s2 Entry 5

### Table s2 Entry 6

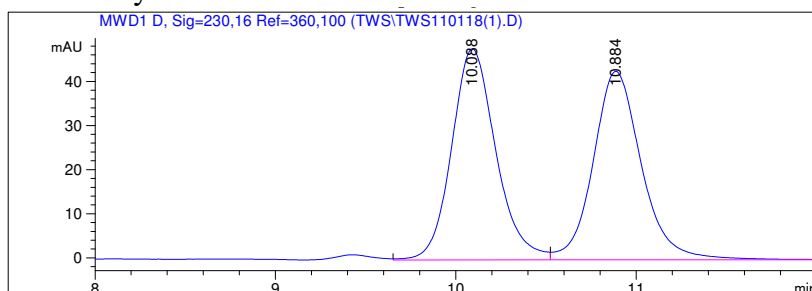

=====  
 Area Percent Report  
 =====

Sorted By : Signal  
 Multiplier: : 1.0000  
 Dilution: : 1.0000  
 Sample Amount: : 1.00000 [ng/ul] (not used in calc.)  
 Do not use Multiplier & Dilution Factor with ISTDs

Signal 1: MWD1 D, Sig=230,16 Ref=360,100

| Peak # | RetTime [min] | Type | Width [min] | Area [mAU*s] | Height [mAU] | Area %  |
|--------|---------------|------|-------------|--------------|--------------|---------|
| 1      | 10.088        | VV   | 0.2584      | 814.27881    | 47.87659     | 50.5448 |
| 2      | 10.884        | VB   | 0.2834      | 796.72626    | 42.75217     | 49.4552 |

Figure s58. HPLC spectrum of chiral arsine 4a in Table s2 Entry 6.

### Table s2 Entry 8

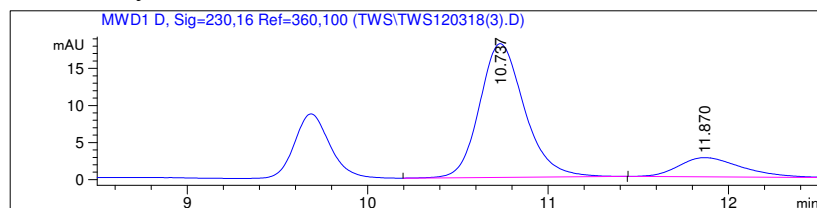

#### Area Percent Report

Sorted By : Signal  
Multiplier: : 1.0000  
Dilution: : 1.0000  
Sample Amount: : 1.00000 [ng/ul] (not used in calc.)  
Do not use Multiplier & Dilution Factor with ISTDs

Signal 1: MWD1 D, Sig=230,16 Ref=360,100

| Peak # | RetTime [min] | Type | Width [min] | Area [mAU*s] | Height [mAU] | Area %  |
|--------|---------------|------|-------------|--------------|--------------|---------|
| 1      | 10.737        | BB   | 0.2635      | 311.71494    | 18.04808     | 82.9013 |
| 2      | 11.870        | BB   | 0.3642      | 64.29214     | 2.60262      | 17.0987 |

Figure s59. HPLC spectrum of chiral arsine **4a** in Table s2 Entry 8.

### Table s2 Entry 9

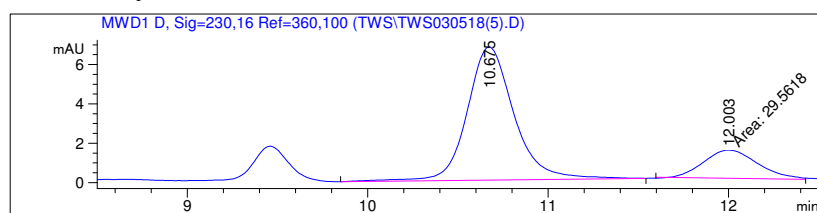

#### Area Percent Report

Sorted By : Signal  
Multiplier: : 1.0000  
Dilution: : 1.0000  
Sample Amount: : 1.00000 [ng/ul] (not used in calc.)  
Do not use Multiplier & Dilution Factor with ISTDs

Signal 1: MWD1 D, Sig=230,16 Ref=360,100

| Peak # | RetTime [min] | Type | Width [min] | Area [mAU*s] | Height [mAU] | Area %  |
|--------|---------------|------|-------------|--------------|--------------|---------|
| 1      | 10.675        | BB   | 0.2708      | 122.36729    | 6.77104      | 80.5424 |
| 2      | 12.003        | MM   | 0.3447      | 29.56179     | 1.42917      | 19.4576 |

Figure s60. HPLC spectrum of chiral arsine **4a** in Table s2 Entry 9.

Table s2 Entry 11

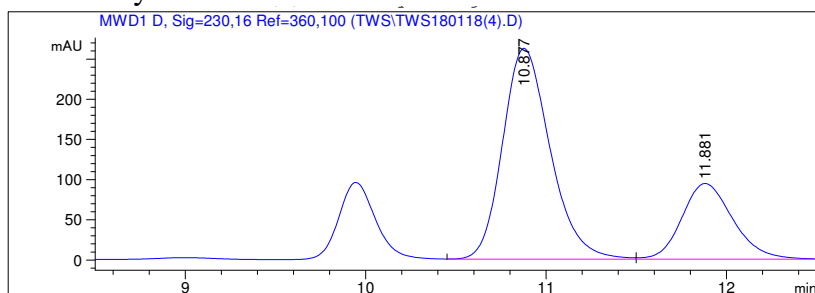

=====  
 Area Percent Report  
 =====

Sorted By : Signal  
 Multiplier: : 1.0000  
 Dilution: : 1.0000  
 Sample Amount: : 1.00000 [ng/ul] (not used in calc.)  
 Do not use Multiplier & Dilution Factor with ISTDs

Signal 1: MWD1 D, Sig=230,16 Ref=360,100

| Peak # | RetTime [min] | Type | Width [min] | Area [mAU*s] | Height [mAU] | Area %  |
|--------|---------------|------|-------------|--------------|--------------|---------|
| 1      | 10.877        | BV   | 0.2814      | 4796.88330   | 262.20886    | 72.0980 |
| 2      | 11.881        | VB   | 0.3020      | 1856.39807   | 94.17924     | 27.9020 |

**Figure s61.** HPLC spectrum of chiral arsine **4a** in Table s2 Entry 11.

## Investigating interactions between Pd catalysts and HAsPh<sub>2</sub>

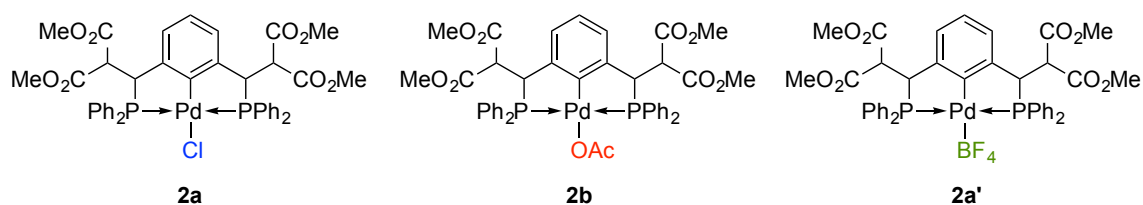

Figure s62. Pd(II)-pincer complexes for investigation.

To investigate interactions between Pd-pincer complexes **2** with HAsPh<sub>2</sub>, a series of experiments were carried out and signals were monitored with <sup>31</sup>P{<sup>1</sup>H} NMR spectroscopy (Table s3).

### Experimental procedure

Preparation of complex **2a'**: Pd complex **2a** (43.78 mg, 0.05 mmol, 1.0 equiv) and AgBF<sub>4</sub> (11.68 mg, 0.06 mmol, 1.2 equiv) was stirred in DCM (2 mL) for 1 h. The crude mixture was passed through a short plug of silica and dried prior to use.

Without base: HAsPh<sub>2</sub> (11.51 mg, 0.05 mmol, 1.0 equiv) and Pd complex **2** (5.00 μmol, 10 mol %) were stirred in CD<sub>3</sub>OD (1.2 mL) for 5 mins at RT.

With base: HAsPh<sub>2</sub> (11.51 mg, 0.05 mmol, 1.0 equiv) and Pd complex **2** (5.00 μmol, 10 mol %) were stirred in CD<sub>3</sub>OD (1.2 mL) for 5 mins at RT. Subsequently, DIPEA (9.58 μL, 0.06 mmol, 1.1 equiv) was added and the solution was stirred for another 5 mins at RT.

Table s3. Interactions between Pd pincer complexes **2** and reagents.

| Entry            | Complex                       | HEPh <sub>2</sub>  | Base  | <sup>31</sup> P{ <sup>1</sup> H} δ (ppm)                    |
|------------------|-------------------------------|--------------------|-------|-------------------------------------------------------------|
| 1                | Pd–BF <sub>4</sub> <b>2a'</b> | -                  | -     | 48.9 (complex <b>2a'</b> )                                  |
| 2                | Pd–OAc <b>2b</b>              | -                  | -     | 49.4 (complex <b>2b</b> )                                   |
| 3                | Pd–Cl <b>2a</b>               | -                  | -     | 48.3 (complex <b>2a</b> )                                   |
| 4 <sup>d</sup>   | Pd–BF <sub>4</sub> <b>2a'</b> | HAsPh <sub>2</sub> | -     | 48.6 (complex <b>2a'</b> )<br>51.8 (intermediate <b>B</b> ) |
| 5 <sup>b,d</sup> | Pd–BF <sub>4</sub> <b>2a'</b> | HAsPh <sub>2</sub> | DIPEA | 53.7 (intermediate <b>A</b> )                               |
| 6 <sup>c</sup>   | Pd–OAc <b>2b</b>              | HAsPh <sub>2</sub> | -     | 53.5 (intermediate <b>A</b> )                               |
| 7 <sup>b,c</sup> | Pd–OAc <b>2b</b>              | HAsPh <sub>2</sub> | DIPEA | 53.7 (intermediate <b>A</b> )                               |
| 8 <sup>a</sup>   | Pd–Cl <b>2a</b>               | HAsPh <sub>2</sub> | -     | 48.4 (complex <b>2a</b> )<br>53.3 (intermediate <b>A</b> )  |
| 9 <sup>a,b</sup> | Pd–Cl <b>2a</b>               | HAsPh <sub>2</sub> | DIPEA | 53.7 (intermediate <b>A</b> )                               |

<sup>a</sup>Reaction conditions: HAsPh<sub>2</sub> (11.51 mg, 0.05 mmol, 1.0 eq.), cat. **2a** (4.38 mg, 5.00 μmol, 10 mol %), CD<sub>3</sub>OD (1.2 mL). <sup>b</sup>DIPEA (9.58 μL, 0.06 mmol, 1.1 eq.) was added. <sup>c</sup>Reaction conditions: HAsPh<sub>2</sub> (11.51 mg, 0.05 mmol, 1.0 eq.), cat. **2b** (4.49 mg, 5.00 μmol, 10 mol %), CD<sub>3</sub>OD (1.2 mL). <sup>d</sup>Reaction conditions: HAsPh<sub>2</sub> (11.51 mg, 0.05 mmol, 1.0 eq.), cat. **2a'** (4.63 mg, 5.00 μmol, 10 mol %), CD<sub>3</sub>OD (1.2 mL).



## Discussion

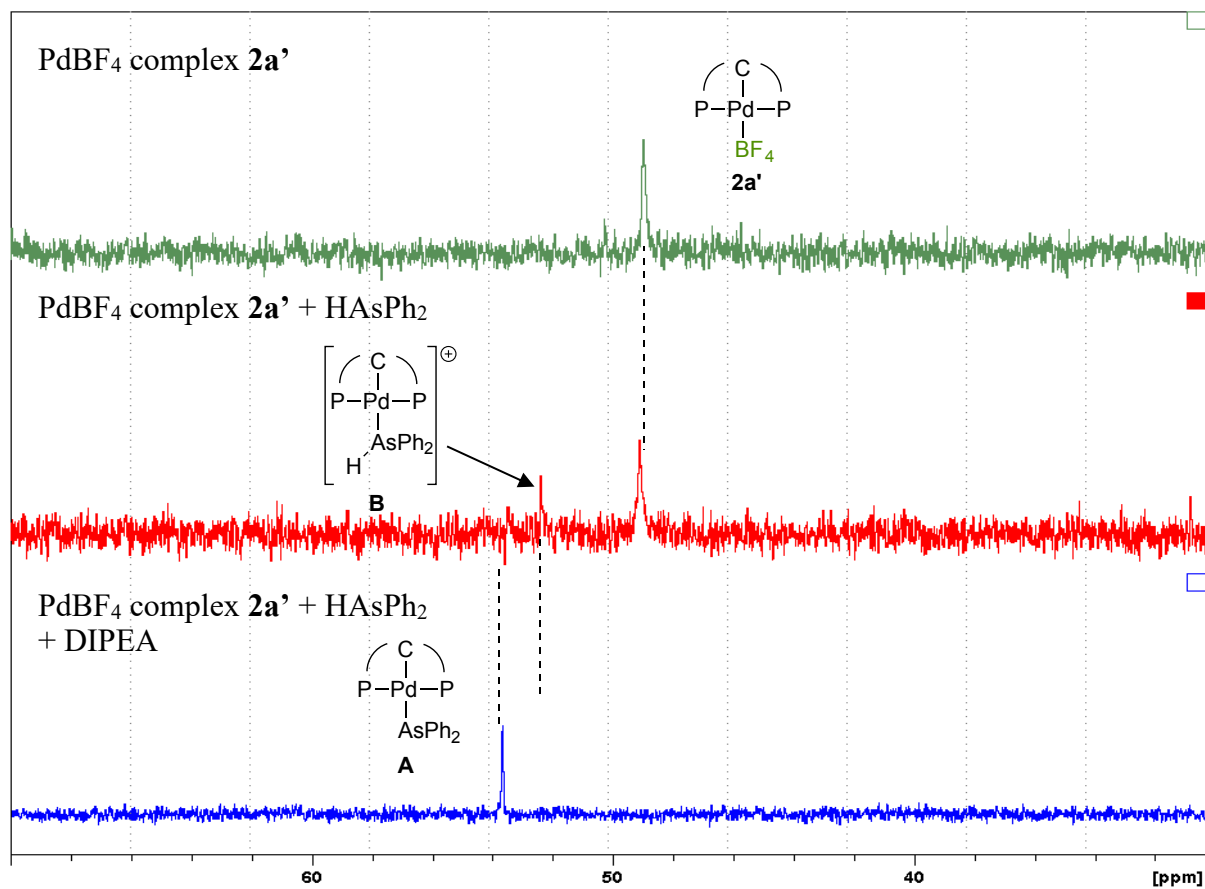

Figure s63.  $^{31}\text{P}\{^1\text{H}\}$  NMR spectra of  $\text{PdBF}_4$  complex  $2\mathbf{a}'$  with reagents.

$\text{PdBF}_4$ -complex  $2\mathbf{a}'$  was specially prepared for the weakly-coordinating and non-basic properties of the  $\text{BF}_4^-$  anion. Signals corresponding to intermediates **A** and **B** can be clearly observed (Figure s63).

In the absence of DIPEA, interaction between  $\text{PdBF}_4$ -complex  $2\mathbf{a}'$  and  $\text{HAsPh}_2$  generated a new signal at 51.8 ppm (intermediate **B**) (Entry 8, Figure s63). As expected, this signal could be cleanly converted to 53.7 ppm (intermediate **A**) upon deprotonation with DIPEA (Entry 9, Figure s63).

These spectra serve as a reference for the signals of intermediates **A** and **B**.

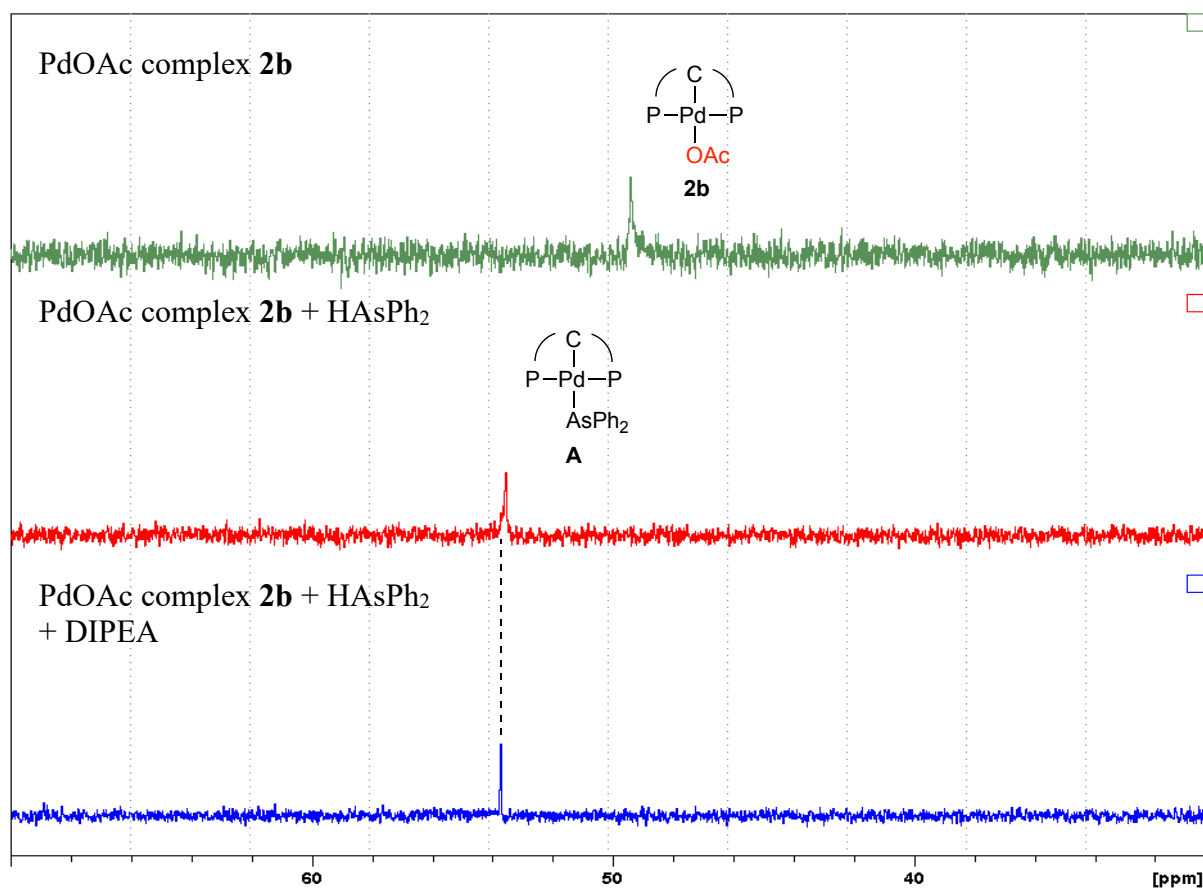

**Figure s64.**  $^{31}\text{P}\{^1\text{H}\}$  NMR spectra of PdOAc complex **2b** with reagents.

When PdOAc-complex **2b** was employed, signal 53.5 ppm (intermediate **A**) was observed even without the addition of DIPEA (Entry 6, Figure s64). No further changes were observed when DIPEA was added (Entry 7, Figure s64), indicating that the PdOAc-complex **2b** counteranion functioned as an internal base.

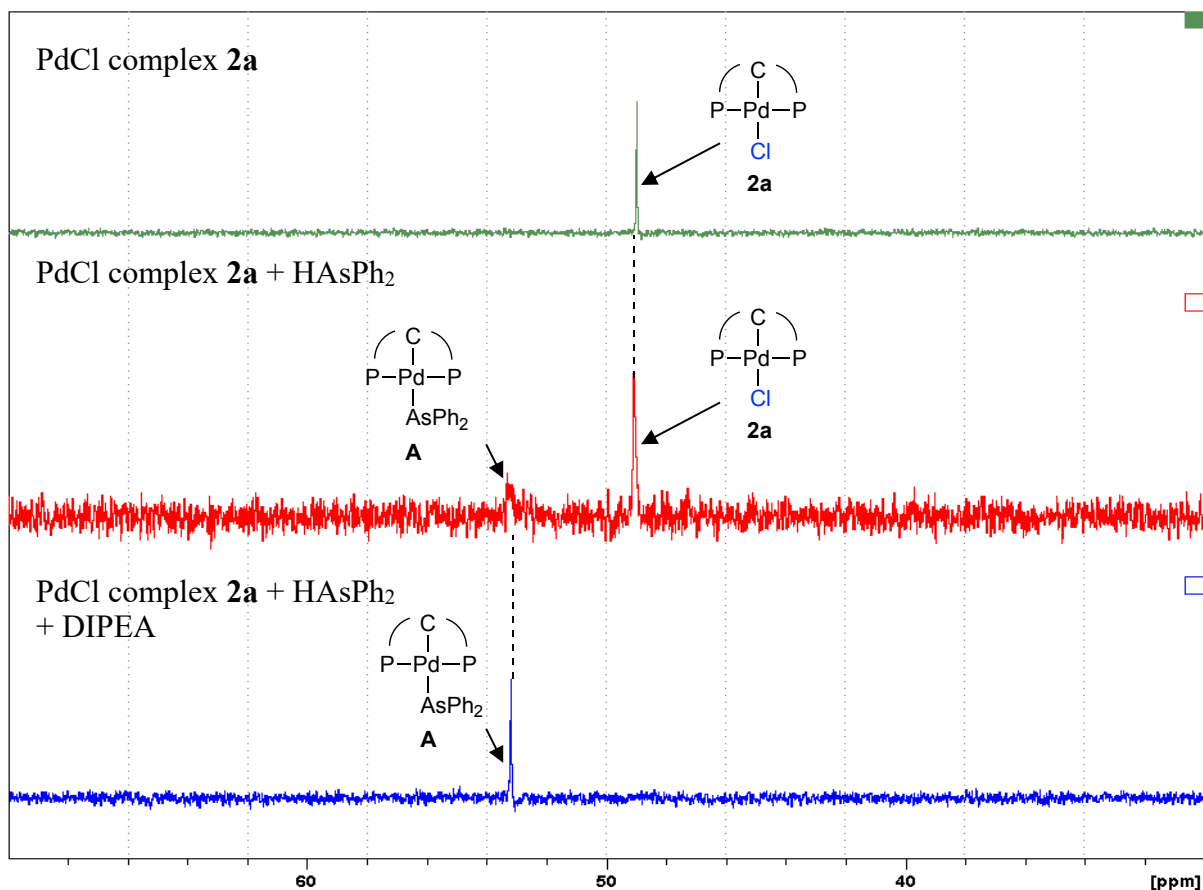

Figure s65.  $^{31}\text{P}\{^1\text{H}\}$  NMR spectra of PdCl complex **2a** with reagents.

When PdCl-complex **2a** and HAsPh<sub>2</sub> were stirred, the original signal at 48.3 ppm remained unchanged and a minor signal at 53.3 ppm (intermediate **A**) was observed (Entry 4, Figure s65). The addition of DIPEA converted the signal at 48.3 ppm to 53.7 ppm (intermediate **A**) (Entry 5, Figure s65). No signal corresponding to intermediate **B** was observed on the NMR timescale.

The minor signal corresponding to signal **A** observed even in the absence of DIPEA may have arisen *via* 3 distinct mechanisms:

1. HAsPh<sub>2</sub> displaces the chloride anion to generate intermediate **B**, which is immediately deprotonated to generate intermediate **A**
2. Transient axial interactions with HAsPh<sub>2</sub> acidify the H–As bond to generate <sup>−</sup>AsPh<sub>2</sub>, which replaces the chloride anion to generate intermediate **A**<sup>8</sup>
3. An equilibrium dissociation of HAsPh<sub>2</sub> occurs in MeOD to generate <sup>−</sup>AsPh<sub>2</sub>, which displaces the chloride anion to generate intermediate **A**<sup>9</sup>

Pathway (3) is the least likely due to the relatively high pK<sub>a</sub> of HAsPh<sub>2</sub> (pK<sub>a</sub> = 20.3).<sup>10</sup> Trace ionization of HAsPh<sub>2</sub> is insufficient to completely account for the observed  $^{31}\text{P}\{^1\text{H}\}$  NMR signal of intermediate **A**.

Both pathways (1) and (2) suggest that the Pd-catalyzed hydroarsination reaction proceeds *via* a similar mechanism as the corresponding hydrophosphination reaction. Interaction with Pd acidifies the H–As bond, allowing deprotonation to generate the reactive arsenide intermediate **A**. Addition of DIPEA as a proton scavenger drives the deprotonation equilibrium forward, thus cleanly generating intermediate **A** as observed in Figure s65.

## Investigating deprotonation of HAsPh<sub>2</sub> in MeOH by weak bases

Hydroarsination reactions catalyzed by Pd-complexes **2** only exhibited good reactivities in alcoholic solvents such as MeOH. The high pK<sub>a</sub> of HAsPh<sub>2</sub> (pK<sub>a</sub> = 20.3)<sup>10</sup> in THF suggests that strong bases were required to deprotonate HAsPh<sub>2</sub>. However, no pK<sub>a</sub> values of HAsPh<sub>2</sub> were available in MeOH to the best of our knowledge.

According to pK<sub>a</sub> values, it should be even harder to deprotonate HPPPh<sub>2</sub>: pK<sub>a</sub> (HAsPh<sub>2</sub>) = 20.3, pK<sub>a</sub> (HPPPh<sub>2</sub>) = 21.7.<sup>10</sup> Thus with HPPPh<sub>2</sub> being the less acidic reagent, <sup>31</sup>P{<sup>1</sup>H} NMR spectroscopy was used as a convenient tool to monitor the effect of DIPEA on the H/D exchange of HPPPh<sub>2</sub> in MeOD.

### Experimental procedure

Without base: HPPPh<sub>2</sub> (9.30 mg, 0.05 mmol, 1.0 equiv) was stirred in CD<sub>3</sub>OD (1.2 mL) for 30 mins at RT.

With base: HPPPh<sub>2</sub> (9.30 mg, 0.05 mmol, 1.0 equiv) was stirred in CD<sub>3</sub>OD (1.2 mL) for 5 mins at RT. Subsequently, DIPEA (9.58 μL, 0.06 mmol, 1.1 equiv) was added and the solution was stirred for the stated time at RT.

### Discussion

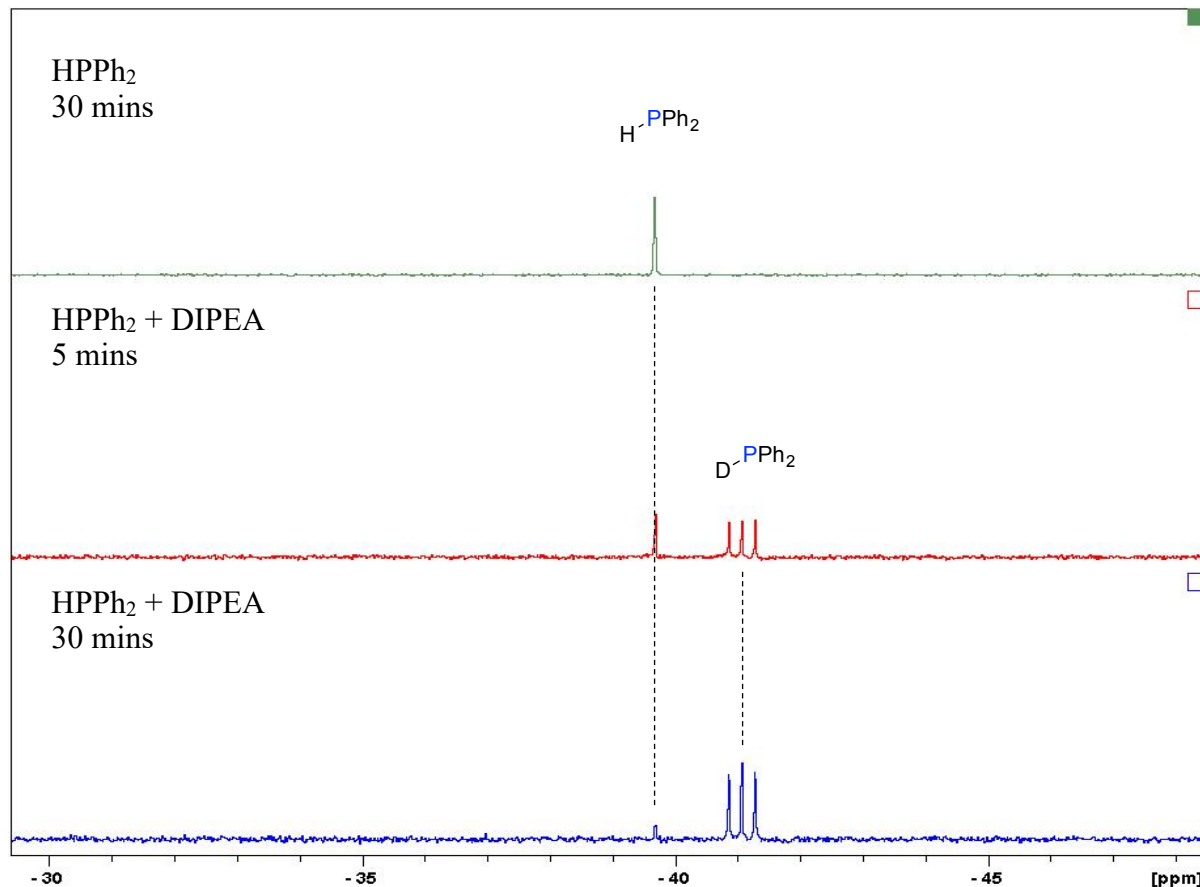

Figure s66. <sup>31</sup>P{<sup>1</sup>H} NMR spectra of HPPPh<sub>2</sub> with DIPEA in MeOD.

Even after 30 mins, only a single singlet was observed for HPPh<sub>2</sub> in the absence of DIPEA. No H/D exchange was observed for HPPh<sub>2</sub> in MeOD.

In the presence of DIPEA, the appearance of a characteristic 1:1:1 triplet corresponding to D-PPh<sub>2</sub> was observed at 5 minutes. Almost complete conversion of H-PPh<sub>2</sub> to D-PPh<sub>2</sub> was observed by 30 mins.

Although rate of base-assisted H/D exchange of HPPh<sub>2</sub> in MeOD is relatively slow, this suggests that DIPEA was able to deprotonate HPPh<sub>2</sub>. With a lower pK<sub>a</sub> value of HAsPh<sub>2</sub> (in THF), DIPEA may similarly facilitate the deprotonation of HAsPh<sub>2</sub>. Further controlled studies are required to determine accurate pK<sub>a</sub> values of HPPh<sub>2</sub> and HAsPh<sub>2</sub> in MeOH. Nevertheless, this indicates that the base-assisted ionization of HAsPh<sub>2</sub> under optimized reaction conditions cannot be completely eliminated.

## Investigating interactions between Pd catalyst **2a** and HPPh<sub>2</sub>

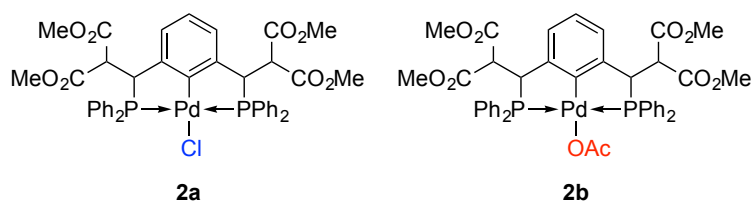

Figure s67. Pd(II)-pincer complexes for investigation.

Interactions between PdOAc catalyst **2b** and HPPh<sub>2</sub> have been well-established independently by the groups of Duan<sup>11</sup> and Leung.<sup>12</sup> To investigate interactions between PdCl complex **2a** with HPPh<sub>2</sub>, a series of experiments were carried out and monitored by <sup>31</sup>P{<sup>1</sup>H} NMR spectroscopy (Table s4).

### Experimental procedure

Without base: HPPh<sub>2</sub> (9.30 mg, 0.05 mmol, 1.0 equiv) and Pd complex **2a** (4.38 mg, 5.00 μmol, 10 mol %) were stirred in the stated solvent (1.2 mL) for 5 mins at RT.

With base: HPPh<sub>2</sub> (9.30 mg, 0.05 mmol, 1.0 equiv) and Pd complex **2a** (4.38 mg, 5.00 μmol, 10 mol %) were stirred in the stated solvent (1.2 mL) for 5 mins at RT. Subsequently, DIPEA (9.58 μL, 0.06 mmol, 1.1 equiv) was added and the solution was stirred for another 5 mins at RT.

Table s4. Interactions between Pd-pincer **2a** and reagents.

| Entry | Species                                                                             | <sup>31</sup> P{ <sup>1</sup> H} δ (ppm) | J (Hz)                                                                  | Multiplicity   |
|-------|-------------------------------------------------------------------------------------|------------------------------------------|-------------------------------------------------------------------------|----------------|
| 1     | H-PPh <sub>2</sub>                                                                  | -41.0                                    | -                                                                       | Singlet        |
| 2     | Pd-Cl <b>2a</b>                                                                     | 48.3                                     | -                                                                       | Singlet        |
| 3     | D-PPh <sub>2</sub>                                                                  | -42.4                                    | 33.9                                                                    | 1:1:1 triplet  |
| 4     | 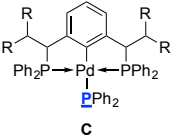 | -8.2                                     | 35.6                                                                    | 1:2:1 triplet  |
| 5     | H-P(O)Ph <sub>2</sub>                                                               | 24.2                                     | -                                                                       | Singlet        |
| 6     |  | 52.5                                     | 35.9                                                                    | Doublet        |
| 7     |  | ND                                       | ND<br>( <sup>2</sup> J <sub>P-P</sub> , <sup>1</sup> J <sub>P-D</sub> ) | ND (multiplet) |
| 8     |  | ND                                       | ND<br>( <sup>2</sup> J <sub>P-P</sub> , <sup>3</sup> J <sub>P-D</sub> ) | ND (multiplet) |

## Discussion

$\text{CDCl}_3$ :

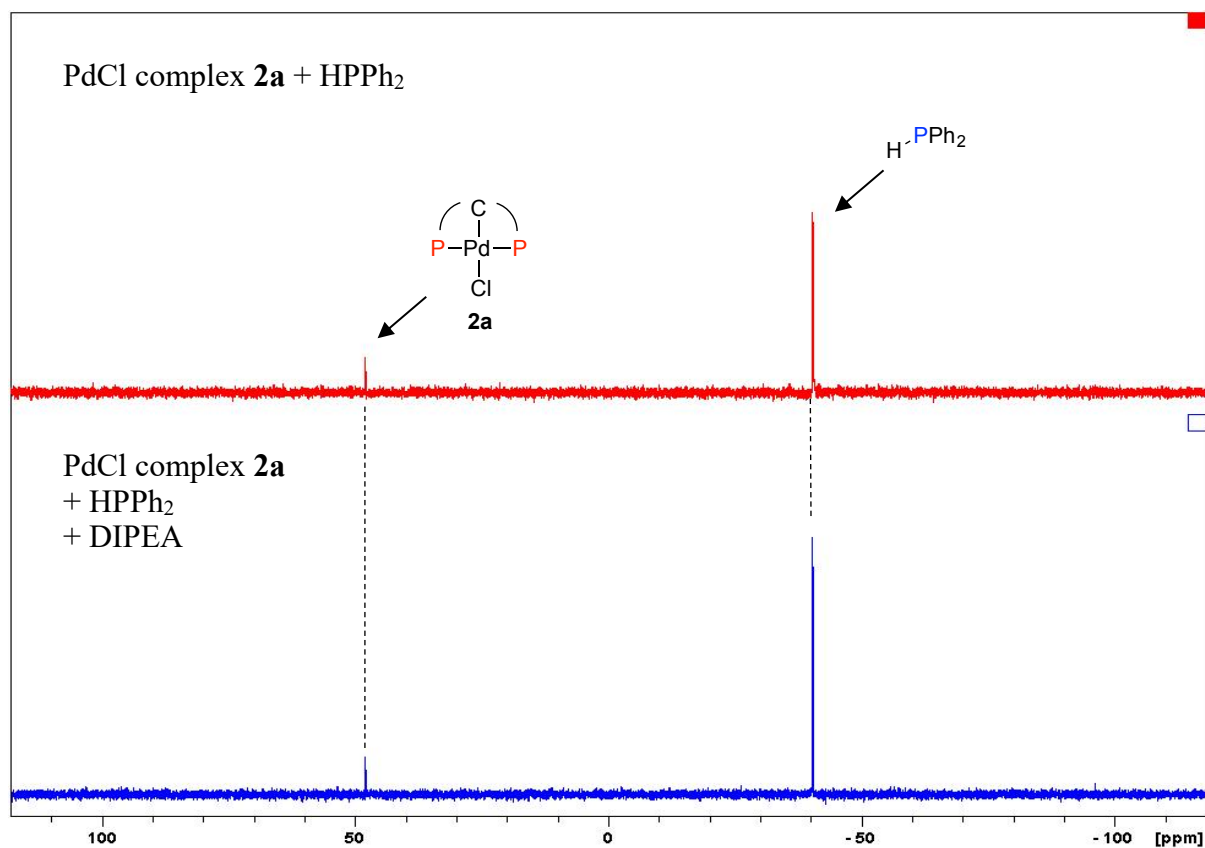

**Figure s68.**  $^{31}\text{P}\{^1\text{H}\}$  NMR spectra of  $\text{PdCl}$  complex **2a** with reagents in  $\text{CDCl}_3$ .

No changes to the signals of catalyst **2a** and  $\text{HPPh}_2$  were observed in  $\text{CDCl}_3$ , with and without the addition of DIPEA (Figure s68). This supports the observation that  $\text{HPPh}_2$  cannot displace the  $\text{Pd}-\text{Cl}$  bond of catalyst **2a** to generate intermediates **B** and/or **C**, even in the presence of DIPEA.

MeOD:

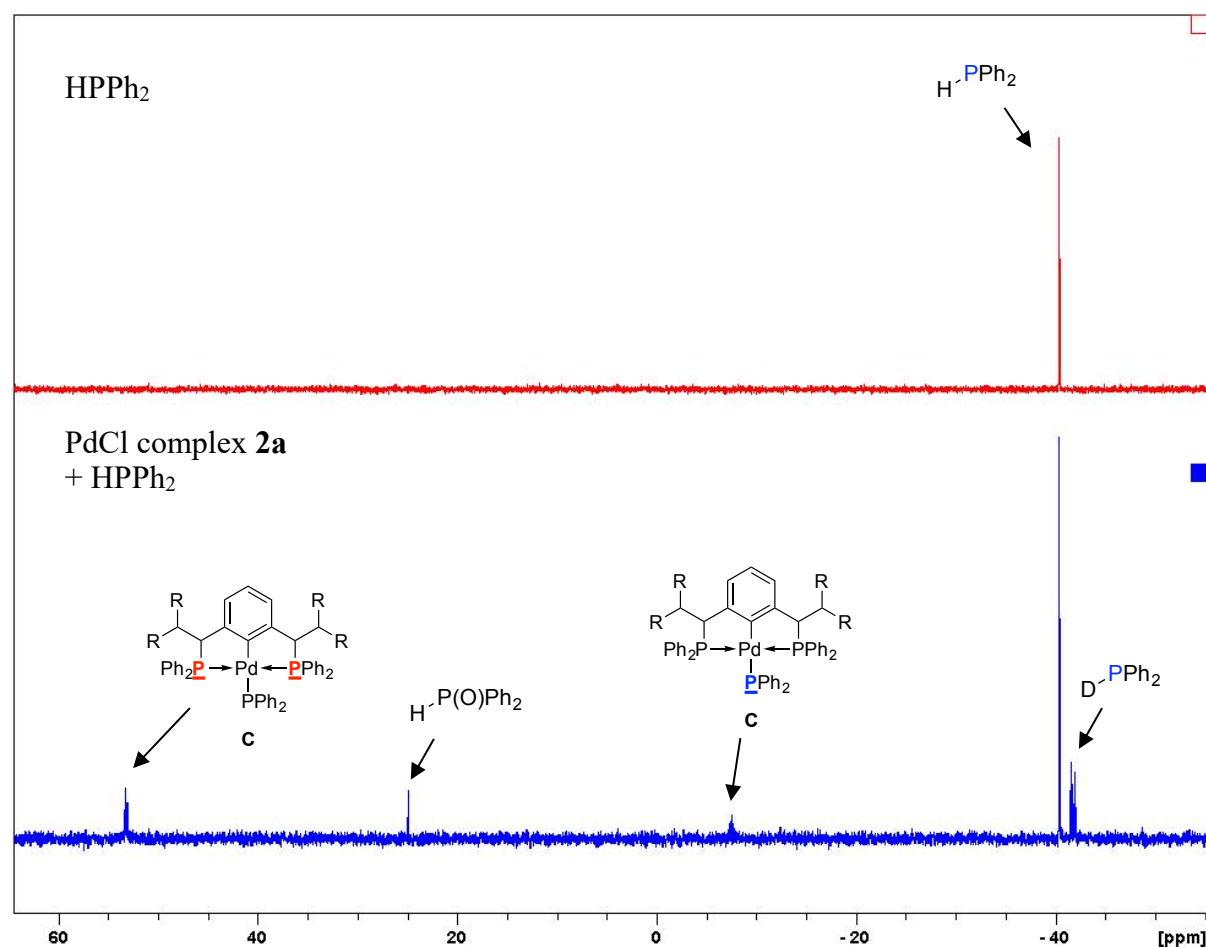

Figure s69.  $^{31}\text{P}\{^1\text{H}\}$  NMR spectra of PdCl complex **2a** with reagents in  $\text{CD}_3\text{OD}$ .

As opposed to the study performed in  $\text{CDCl}_3$  (Figure s68), two notable observations were made upon addition of catalyst **2a** to  $\text{HPPh}_2$  in MeOD : 1) appearance of a triplet at -42.4 ppm and 2) a change of chemical shift and splitting patterns of the signal corresponding to catalyst **2a**. This indicates that the choice of solvent has a direct influence in the reaction.

Firstly, it was observed that a H/D exchange of (H/D)- $\text{PPh}_2$  occurred only in the presence of catalyst **2a**. Clearly, interaction between catalyst **2a** and  $\text{HPPh}_2$  is required to weaken the H-P $\text{Ph}_2$  bond. As the exchange occurred without the appearance of a free phosphine signal belonging to the dissociated PCP ligand, it remains possible that weak axial interactions between Pd and (H/D)- $\text{PPh}_2$  were involved.<sup>8</sup> This weakening of the H-P $\text{Ph}_2$  bond consequently resulted in the clean conversion of catalyst **2a** to intermediate **C** (Table s4, Entries 4 and 6). The further addition of DIPEA did not result in changes to the signal of intermediate **C**.

This differs from experimental observations between catalyst **2a** and  $\text{HAsPh}_2$  (Figure s65).

With  $\text{HPPh}_2$ : catalyst **2a** is cleanly converted to intermediate **C**

With  $\text{HAsPh}_2$ : catalyst **2a** remains as the major signal. This is partially supported by the lower pKa values of  $\text{HAsPh}_2$  which suggest that deprotonation of H-As is relatively more challenging.<sup>10</sup> It must be noted that catalyst **2** may acidify the H-P and H-As bonds to different extents.<sup>13</sup> DIPEA was required to generate intermediate **A** cleanly.



## References

- [1] Y. Huang, R. J. Chew, Y., Li, S. A. Pullarkat and P.-H. Leung, *Org. Lett.*, 2011, **13**, 5862.
- [2] Y. Huang, S. A. Pullarkat, Y. Li and P.-H. Leung, *Chem. Commun*, 2010, **46**, 6950.
- [3] X.-Y. Yang, W. S. Tay, Y. Li, S. A. Pullarkat and P.-H. Leung, *Chem. Commun*. 2016, **52**, 4211.
- [4] W. S. Tay, X.-Y. Yang, Y. Li, S. A. Pullarkat and P.-H. Leung, *RSC Advances* 2016, **6**, 75951.
- [5] M. Duan, Y. Liu, J. Ao, L. Xue, S. Luo, Y. Tan, W. Qin, C. E. Song and H. Yan, *Org. Lett.* 2017, **19**, 2298.
- [6] X.-Y. Yang, W. S. Tay, Y. Li, S. A. Pullarkat and P.-H. Leung, *Organometallics*, 2015, **34**, 5196.
- [7] X.-Y. Yang, W. S. Tay, Y. Li, S. A. Pullarkat and P.-H. Leung, *Organometallics*, 2015, **34**, 1582.
- [8] a) L. Maresca and G. Natile, *Comments Inorg. Chem.* 1993, **14**, 349; b) P.-H. Leung, G. M. McLaughlin, J. W. L. Martin, S. B. Wild, *Inorg. Chem.* 1986, **25**, 3392; c) J. K.-P. Ng, G.-K. Tan, J. J. Vittal and P.-H. Leung, *Inorg. Chem.* 2003, **42**, 7674; d) Y. L. Cheow, S. A. Pullarkat, Y. Li and P.-H. Leung, *J. Organomet. Chem.* 2012, **696**, 4215; e) G. Salem and S. B. Wild, *Inorg. Chem.* 1992, **31**, 581.
- [9] The extent of ionization of secondary arsines was investigated in (a) V. K. Gupta, L. K. Krannich and C. L. Watkins, *Inorg. Chim. Acta.* 1987, **134**, 197, (b) W. R. Cullen, W. R. Leeder, *Can. J. Chem.* 1970, **48**, 3757.
- [10] a) K. Issleib, and R. Kümmel, *R. J. Organomet. Chem.* 1965, **3**, 84; b) J.-N. Li, L. Liu, Y. F and Q.-X. Guo, *Tetrahedron*, 2006, **62**, 4453.
- [11] J.-J. Feng, X.-F. Chen, M. Shi and W.-L. Duan, *J. Am. Chem. Soc.* 2010, **132**, 5562.
- [12] X.-Y. Yang, J. H. Gan, Y. Li, S. A. Pullarkat and P.-H. Leung, *Dalton Trans.* 2015, **44**, 1258.
- [13] G. M. Bodner, M. P. May and L. E. McKinney, *Inorg. Chem.* 1980, **19**, 1951.

### X-ray structure and crystallographic data for compound 3

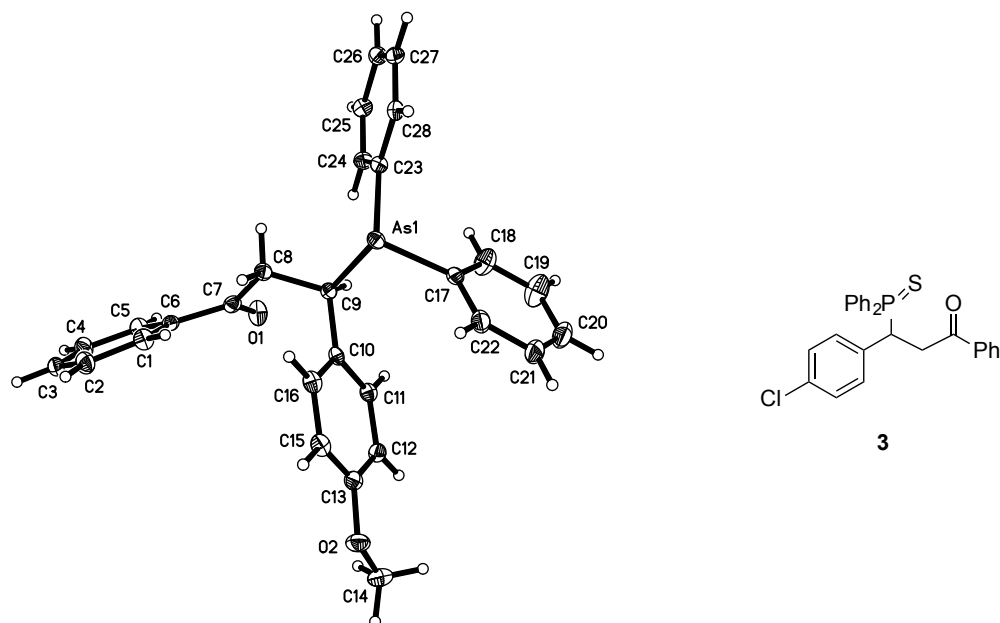

Figure s70. Molecular structure of phosphine sulfide 3.

### Crystallographic data for phosphine sulfide 3

|                                            |                                        |                     |
|--------------------------------------------|----------------------------------------|---------------------|
| <b>Identification code</b>                 | leung1078m                             |                     |
| <b>Chemical formula</b>                    | C <sub>27</sub> H <sub>22</sub> ClOPS  |                     |
| <b>Formula weight</b>                      | 460.92 g/mol                           |                     |
| <b>Temperature</b>                         | 100(2) K                               |                     |
| <b>Wavelength</b>                          | 0.71073 Å                              |                     |
| <b>Crystal size</b>                        | 0.200 x 0.220 x 0.240 mm               |                     |
| <b>Crystal habit</b>                       | colorless block                        |                     |
| <b>Crystal system</b>                      | orthorhombic                           |                     |
| <b>Space group</b>                         | P 21 21 21                             |                     |
| <b>Unit cell dimensions</b>                | a = 6.4374(2) Å                        | $\alpha = 90^\circ$ |
|                                            | b = 17.2220(7) Å                       | $\beta = 90^\circ$  |
|                                            | c = 21.0699(9) Å                       | $\gamma = 90^\circ$ |
| <b>Volume</b>                              | 2335.91(16) Å <sup>3</sup>             |                     |
| <b>Z</b>                                   | 4                                      |                     |
| <b>Density (calculated)</b>                | 1.311 g/cm <sup>3</sup>                |                     |
| <b>Absorption coefficient</b>              | 0.338 mm <sup>-1</sup>                 |                     |
| <b>F(000)</b>                              | 960                                    |                     |
| <b>Theta range for data collection</b>     | 2.27 to 30.02°                         |                     |
| <b>Index ranges</b>                        | -8 ≤ h ≤ 9, -23 ≤ k ≤ 24, -29 ≤ l ≤ 15 |                     |
| <b>Reflections collected</b>               | 18546                                  |                     |
| <b>Independent reflections</b>             | 6539 [R(int) = 0.0623]                 |                     |
| <b>Coverage of independent reflections</b> | 99.6%                                  |                     |
| <b>Absorption correction</b>               | Multi-Scan                             |                     |
| <b>Max. and min. transmission</b>          | 0.9350 and 0.9230                      |                     |

|                                       |                                                                                                                         |
|---------------------------------------|-------------------------------------------------------------------------------------------------------------------------|
| <b>Structure solution technique</b>   | direct methods                                                                                                          |
| <b>Structure solution program</b>     | XT, VERSION 2014/5                                                                                                      |
| <b>Refinement method</b>              | Full-matrix least-squares on F2                                                                                         |
| <b>Refinement program</b>             | SHELXL-2016/6 (Sheldrick, 2016)                                                                                         |
| <b>Function minimized</b>             | $\Sigma w(F_o^2 - F_c^2)^2$                                                                                             |
| <b>Data / restraints / parameters</b> | 6539 / 0 / 280                                                                                                          |
| <b>Goodness-of-fit on F2</b>          | 1.018                                                                                                                   |
|                                       | 4855                                                                                                                    |
| <b>Final R indices</b>                | data; R1 = 0.0537, wR2 = 0.1042<br>I>2 $\sigma$ (I)                                                                     |
|                                       | all data R1 = 0.0864, wR2 = 0.1224                                                                                      |
| <b>Weighting scheme</b>               | w=1/[ $\sigma^2(F_o^2)+(0.0458P)^2+0.8281P$ ]<br>where P=(F <sub>o</sub> <sup>2</sup> +2F <sub>c</sub> <sup>2</sup> )/3 |
| <b>Absolute structure parameter</b>   | 0.03(5)                                                                                                                 |
| <b>Largest diff. peak and hole</b>    | 0.333 and -0.569 eÅ <sup>-3</sup>                                                                                       |
| <b>R.M.S. deviation from mean</b>     | 0.075 eÅ <sup>-3</sup>                                                                                                  |

*Table s5. Bond lengths (Å) of phosphine sulfide 3.*

|         |          |         |          |
|---------|----------|---------|----------|
| C1-C6   | 1.388(5) | C1-C2   | 1.386(5) |
| C1-H1   | 0.95     | C2-C3   | 1.375(6) |
| C2-H2   | 0.95     | C3-C4   | 1.385(6) |
| C3-C11  | 1.742(4) | C4-C5   | 1.397(5) |
| C4-H4   | 0.95     | C5-C6   | 1.386(5) |
| C5-H5   | 0.95     | C6-C7   | 1.520(5) |
| C7-C8   | 1.531(5) | C7-P1   | 1.852(4) |
| C7-H7   | 1.0      | C8-C9   | 1.518(5) |
| C8-H8A  | 0.99     | C8-H8B  | 0.99     |
| C9-O1   | 1.224(4) | C9-C10  | 1.487(5) |
| C10-C11 | 1.389(6) | C10-C15 | 1.396(5) |
| C11-C12 | 1.392(5) | C11-H11 | 0.95     |
| C12-C13 | 1.380(6) | C12-H12 | 0.95     |
| C13-C14 | 1.382(6) | C13-H13 | 0.95     |
| C14-C15 | 1.388(6) | C14-H14 | 0.95     |
| C15-H15 | 0.95     | C16-C17 | 1.395(5) |
| C16-C21 | 1.399(5) | C16-P1  | 1.822(4) |
| C17-C18 | 1.389(5) | C17-H17 | 0.95     |
| C18-C19 | 1.383(6) | C18-H18 | 0.95     |
| C19-C20 | 1.377(5) | C19-H19 | 0.95     |
| C20-C21 | 1.393(5) | C20-H20 | 0.95     |
| C21-H21 | 0.95     | C22-C23 | 1.386(5) |
| C22-C27 | 1.399(5) | C22-P1  | 1.815(4) |
| C23-C24 | 1.384(6) | C23-H23 | 0.95     |
| C24-C25 | 1.373(6) | C24-H24 | 0.95     |
| C25-C26 | 1.368(6) | C25-H25 | 0.95     |

|         |          |         |            |
|---------|----------|---------|------------|
| C26-C27 | 1.380(6) | C26-H26 | 0.95       |
| C27-H27 | 0.95     | P1-S1   | 1.9535(13) |

*Table s6. Bond angles (°) of phosphine sulfide 3.*

|             |          |             |          |
|-------------|----------|-------------|----------|
| C6-C1-C2    | 121.5(4) | C6-C1-H1    | 119.3    |
| C2-C1-H1    | 119.3    | C3-C2-C1    | 118.9(4) |
| C3-C2-H2    | 120.5    | C1-C2-H2    | 120.5    |
| C2-C3-C4    | 121.5(4) | C2-C3-C11   | 118.8(3) |
| C4-C3-C11   | 119.7(3) | C3-C4-C5    | 118.6(4) |
| C3-C4-H4    | 120.7    | C5-C4-H4    | 120.7    |
| C6-C5-C4    | 121.1(4) | C6-C5-H5    | 119.4    |
| C4-C5-H5    | 119.4    | C1-C6-C5    | 118.4(4) |
| C1-C6-C7    | 119.5(3) | C5-C6-C7    | 122.0(3) |
| C6-C7-C8    | 113.0(3) | C6-C7-P1    | 111.1(3) |
| C8-C7-P1    | 108.6(2) | C6-C7-H7    | 108.0    |
| C8-C7-H7    | 108.0    | P1-C7-H7    | 108.0    |
| C9-C8-C7    | 112.5(3) | C9-C8-H8A   | 109.1    |
| C7-C8-H8A   | 109.1    | C9-C8-H8B   | 109.1    |
| C7-C8-H8B   | 109.1    | H8A-C8-H8B  | 107.8    |
| O1-C9-C10   | 120.8(4) | O1-C9-C8    | 119.5(4) |
| C10-C9-C8   | 119.6(3) | C11-C10-C15 | 118.8(4) |
| C11-C10-C9  | 122.2(3) | C15-C10-C9  | 119.0(4) |
| C10-C11-C12 | 120.4(4) | C10-C11-H11 | 119.8    |
| C12-C11-H11 | 119.8    | C13-C12-C11 | 120.2(4) |
| C13-C12-H12 | 119.9    | C11-C12-H12 | 119.9    |
| C12-C13-C14 | 120.1(4) | C12-C13-H13 | 120.0    |
| C14-C13-H13 | 120.0    | C13-C14-C15 | 120.0(4) |
| C13-C14-H14 | 120.0    | C15-C14-H14 | 120.0    |
| C14-C15-C10 | 120.6(4) | C14-C15-H15 | 119.7    |
| C10-C15-H15 | 119.7    | C17-C16-C21 | 119.5(3) |
| C17-C16-P1  | 118.0(3) | C21-C16-P1  | 122.4(3) |
| C18-C17-C16 | 120.2(3) | C18-C17-H17 | 119.9    |
| C16-C17-H17 | 119.9    | C19-C18-C17 | 119.8(3) |
| C19-C18-H18 | 120.1    | C17-C18-H18 | 120.1    |
| C20-C19-C18 | 120.4(4) | C20-C19-H19 | 119.8    |
| C18-C19-H19 | 119.8    | C19-C20-C21 | 120.4(4) |
| C19-C20-H20 | 119.8    | C21-C20-H20 | 119.8    |
| C20-C21-C16 | 119.5(3) | C20-C21-H21 | 120.2    |
| C16-C21-H21 | 120.2    | C23-C22-C27 | 119.3(4) |
| C23-C22-P1  | 122.6(3) | C27-C22-P1  | 118.1(3) |
| C24-C23-C22 | 119.9(4) | C24-C23-H23 | 120.1    |
| C22-C23-H23 | 120.1    | C25-C24-C23 | 120.2(4) |
| C25-C24-H24 | 119.9    | C23-C24-H24 | 119.9    |
| C26-C25-C24 | 120.5(4) | C26-C25-H25 | 119.7    |

|             |            |             |            |
|-------------|------------|-------------|------------|
| C24-C25-H25 | 119.7      | C25-C26-C27 | 120.3(4)   |
| C25-C26-H26 | 119.9      | C27-C26-H26 | 119.9      |
| C26-C27-C22 | 119.8(4)   | C26-C27-H27 | 120.1      |
| C22-C27-H27 | 120.1      | C22-P1-C16  | 108.76(17) |
| C22-P1-C7   | 106.08(17) | C16-P1-C7   | 104.83(17) |
| C22-P1-S1   | 112.10(13) | C16-P1-S1   | 112.36(12) |
| C7-P1-S1    | 112.25(13) |             |            |

## X-ray structure and crystallographic data for compound 7

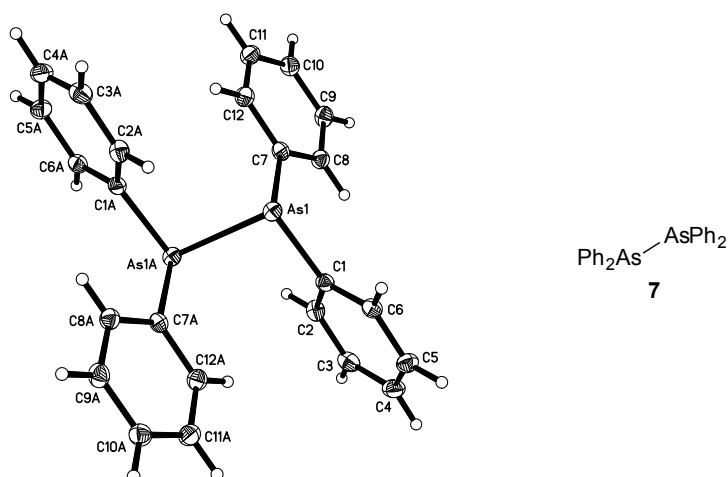

Figure s71. Molecular structure of tetraphenyldiarsine 7.

## Crystallographic data for tetraphenyldiarsine 7

|                                            |                                                             |                             |
|--------------------------------------------|-------------------------------------------------------------|-----------------------------|
| <b>Identification code</b>                 | leung1028m                                                  |                             |
| <b>Chemical formula</b>                    | $\text{C}_{24}\text{H}_{20}\text{As}_2$                     |                             |
| <b>Formula weight</b>                      | 458.24 g/mol                                                |                             |
| <b>Temperature</b>                         | 100(2) K                                                    |                             |
| <b>Wavelength</b>                          | 0.71073 Å                                                   |                             |
| <b>Crystal size</b>                        | 0.040 x 0.200 x 0.220 mm                                    |                             |
| <b>Crystal habit</b>                       | colorless plate                                             |                             |
| <b>Crystal system</b>                      | monoclinic                                                  |                             |
| <b>Space group</b>                         | P 1 21/n 1                                                  |                             |
| <b>Unit cell dimensions</b>                | $a = 6.1992(2)$ Å                                           | $\alpha = 90^\circ$         |
|                                            | $b = 7.3524(2)$ Å                                           | $\beta = 90.9970(10)^\circ$ |
|                                            | $c = 21.2601(5)$ Å                                          | $\gamma = 90^\circ$         |
| <b>Volume</b>                              | $968.87(5)$ Å <sup>3</sup>                                  |                             |
| <b>Z</b>                                   | 2                                                           |                             |
| <b>Density (calculated)</b>                | 1.571 g/cm <sup>3</sup>                                     |                             |
| <b>Absorption coefficient</b>              | 3.453 mm <sup>-1</sup>                                      |                             |
| <b>F(000)</b>                              | 460                                                         |                             |
| <b>Theta range for data collection</b>     | 2.93 to 35.01°                                              |                             |
| <b>Index ranges</b>                        | $-9 \leq h \leq 10, -11 \leq k \leq 11, -34 \leq l \leq 34$ |                             |
| <b>Reflections collected</b>               | 21465                                                       |                             |
| <b>Independent reflections</b>             | 4263 [R(int) = 0.0650]                                      |                             |
| <b>Coverage of independent reflections</b> | 99.9%                                                       |                             |
| <b>Absorption correction</b>               | Multi-Scan                                                  |                             |
| <b>Max. and min. transmission</b>          | 0.8740 and 0.5170                                           |                             |
| <b>Structure solution technique</b>        | direct methods                                              |                             |
| <b>Structure solution program</b>          | XT, VERSION 2014/5                                          |                             |

|                                         |                                                                                                                       |
|-----------------------------------------|-----------------------------------------------------------------------------------------------------------------------|
| <b>Refinement method</b>                | Full-matrix least-squares on F2                                                                                       |
| <b>Refinement program</b>               | SHELXL-2016/6 (Sheldrick, 2016)                                                                                       |
| <b>Function minimized</b>               | $\Sigma w(F_o^2 - F_c^2)^2$                                                                                           |
| <b>Data / restraints / parameters</b>   | 4263 / 0 / 118                                                                                                        |
| <b>Goodness-of-fit on F2</b>            | 1.021                                                                                                                 |
| <b><math>\Delta/\sigma_{max}</math></b> | 0.001                                                                                                                 |
| <b>Final R indices</b>                  | 3075 data; I>2 $\sigma$ (I) R1 = 0.0376, wR2 = 0.0641<br>all data R1 = 0.0669, wR2 = 0.0742                           |
| <b>Weighting scheme</b>                 | w=1/[ $\sigma(F_o^2)+(0.0193P)^2+0.8255P$ ]<br>where P=(F <sub>o</sub> <sup>2</sup> +2F <sub>c</sub> <sup>2</sup> )/3 |
| <b>Largest diff. peak and hole</b>      | 0.731 and -0.593 eÅ <sup>-3</sup>                                                                                     |
| <b>R.M.S. deviation from mean</b>       | 0.126 eÅ <sup>-3</sup>                                                                                                |

*Table s7. Bond lengths (Å) of tetraphenyldiarsine 7.*

|         |            |         |            |
|---------|------------|---------|------------|
| As1-C1  | 1.9545(19) | As1-C7  | 1.9606(19) |
| As1-As1 | 2.4603(4)  | C1-C6   | 1.390(3)   |
| C1-C2   | 1.398(3)   | C2-C3   | 1.389(3)   |
| C2-H2   | 0.95       | C3-C4   | 1.387(3)   |
| C3-H3   | 0.95       | C4-C5   | 1.381(3)   |
| C4-H4   | 0.95       | C5-C6   | 1.396(3)   |
| C5-H5   | 0.95       | C6-H6   | 0.95       |
| C7-C8   | 1.394(3)   | C7-C12  | 1.403(3)   |
| C8-C9   | 1.394(3)   | C8-H8   | 0.95       |
| C9-C10  | 1.387(3)   | C9-H9   | 0.95       |
| C10-C11 | 1.386(3)   | C10-H10 | 0.95       |
| C11-C12 | 1.390(3)   | C11-H11 | 0.95       |
| C12-H12 | 0.95       |         |            |

*Table s8. Bond angles (°) of tetraphenyldiarsine 7.*

|            |            |            |            |
|------------|------------|------------|------------|
| C1-As1-C7  | 102.54(8)  | C1-As1-As1 | 95.03(6)   |
| C7-As1-As1 | 95.46(6)   | C6-C1-C2   | 118.97(18) |
| C6-C1-As1  | 115.80(14) | C2-C1-As1  | 124.99(15) |
| C3-C2-C1   | 120.79(19) | C3-C2-H2   | 119.6      |
| C1-C2-H2   | 119.6      | C4-C3-C2   | 119.53(19) |
| C4-C3-H3   | 120.2      | C2-C3-H3   | 120.2      |
| C5-C4-C3   | 120.38(19) | C5-C4-H4   | 119.8      |
| C3-C4-H4   | 119.8      | C4-C5-C6   | 120.0(2)   |
| C4-C5-H5   | 120.0      | C6-C5-H5   | 120.0      |
| C1-C6-C5   | 120.28(19) | C1-C6-H6   | 119.9      |
| C5-C6-H6   | 119.9      | C8-C7-C12  | 119.18(18) |
| C8-C7-As1  | 124.13(15) | C12-C7-As1 | 116.60(14) |
| C7-C8-C9   | 120.27(19) | C7-C8-H8   | 119.9      |
| C9-C8-H8   | 119.9      | C10-C9-C8  | 120.15(19) |

|             |            |             |            |
|-------------|------------|-------------|------------|
| C10-C9-H9   | 119.9      | C8-C9-H9    | 119.9      |
| C11-C10-C9  | 119.95(19) | C11-C10-H10 | 120.0      |
| C9-C10-H10  | 120.0      | C10-C11-C12 | 120.40(19) |
| C10-C11-H11 | 119.8      | C12-C11-H11 | 119.8      |
| C11-C12-C7  | 120.03(19) | C11-C12-H12 | 120.0      |
| C7-C12-H12  | 120.0      |             |            |
